# Supplementary material for: CuCl/air-mediated oxidative coupling reaction of imidazoheterocycles with N-aryl glycine esters
Source: Royal Society of Chemistry journal article supplement (doi:10.1039/c7ra05303g), 2017-01-01

# CuCl/Air-mediated Oxidative Coupling Reaction of Imidazoheterocycles with Glycine Esters

Jing Jiao<sup>a,b</sup>, Jun-Rong Zhang<sup>a</sup>, Yan-Yan Liao<sup>a</sup>, Li Xu<sup>a</sup>, Mao-Lin Hu<sup>\*b</sup> and Ri-Yuan  
Tang<sup>\*a</sup>

<sup>a</sup> Department of Applied Chemistry, College of Materials and Energy, South China Agricultural  
University, Guangzhou 510642, China

E-mail: [rytang@scau.edu.cn](mailto:rytang@scau.edu.cn)

<sup>b</sup> College of Chemistry and Materials Engineering, Wenzhou University, Wenzhou 325035, China

E-mail: [maolin@wzu.edu.cn](mailto:maolin@wzu.edu.cn)

**NMR Spectra for products**

ethyl 2-(phenylamino)-2-(2-phenylimidazo[1,2-a]pyridin-3-yl)acetate(3)

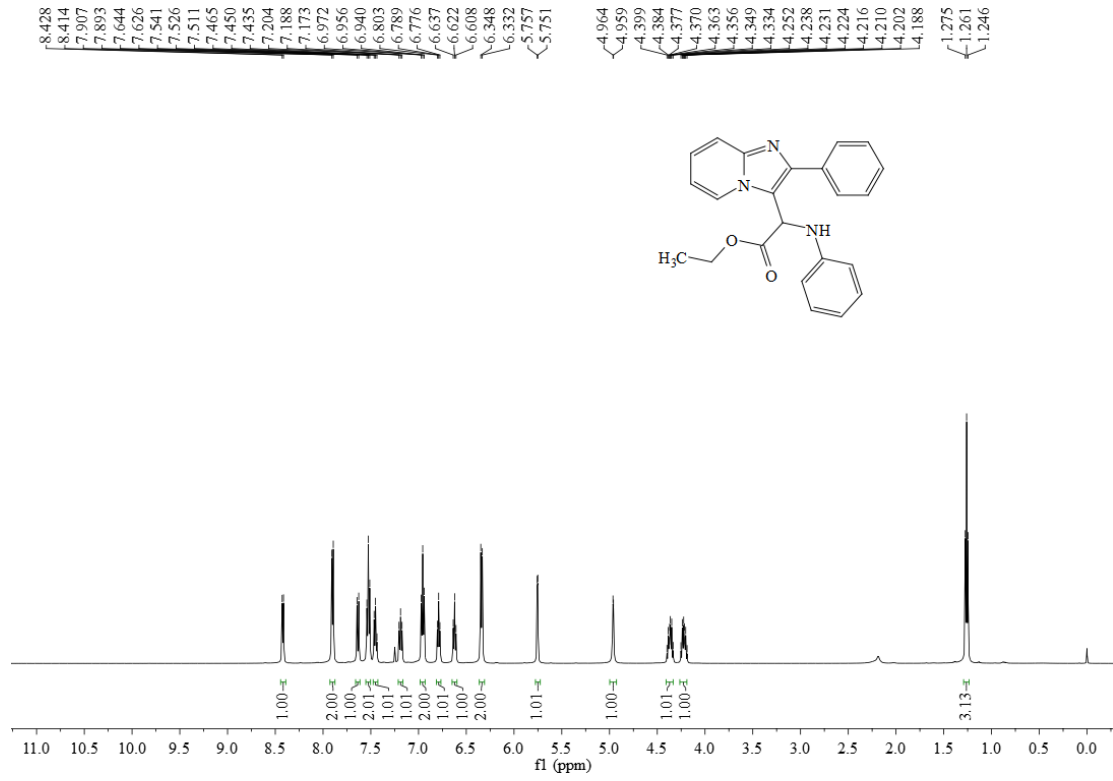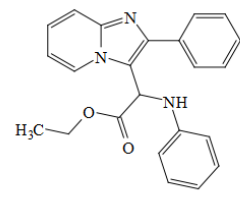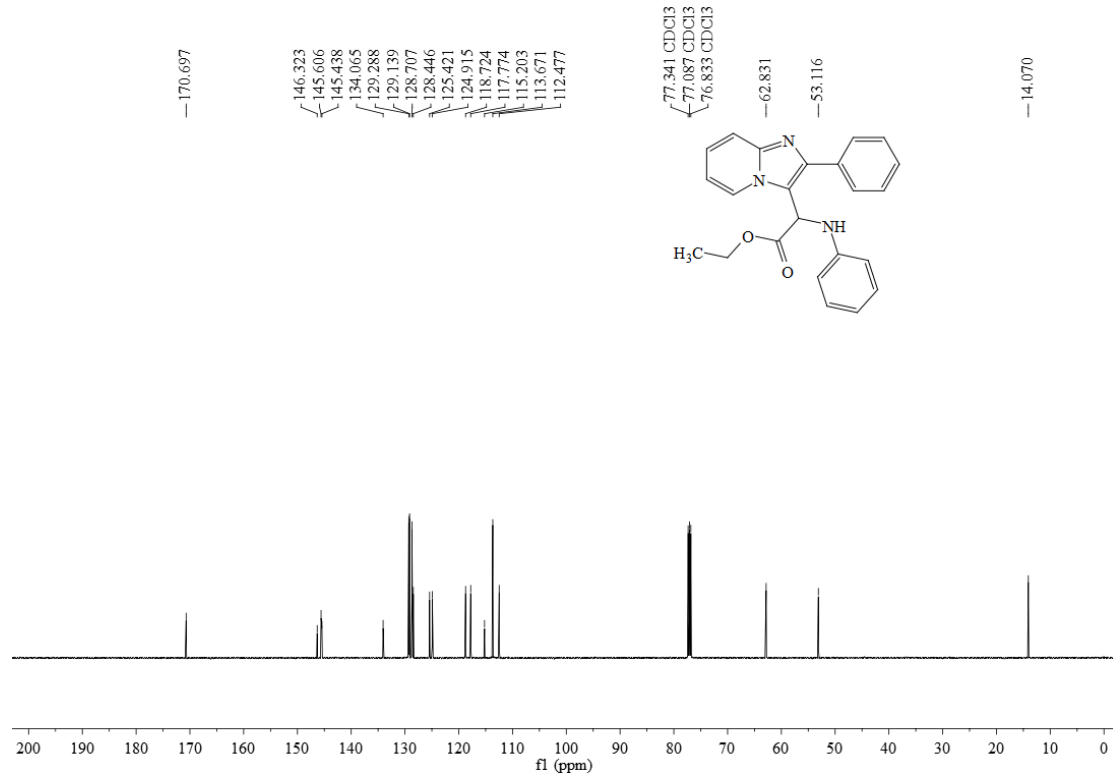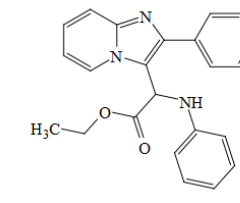

ethyl 2-(6-methyl-2-phenylimidazo[1,2-a]pyridin-3-yl)-2-(phenylamino)acetate (4)

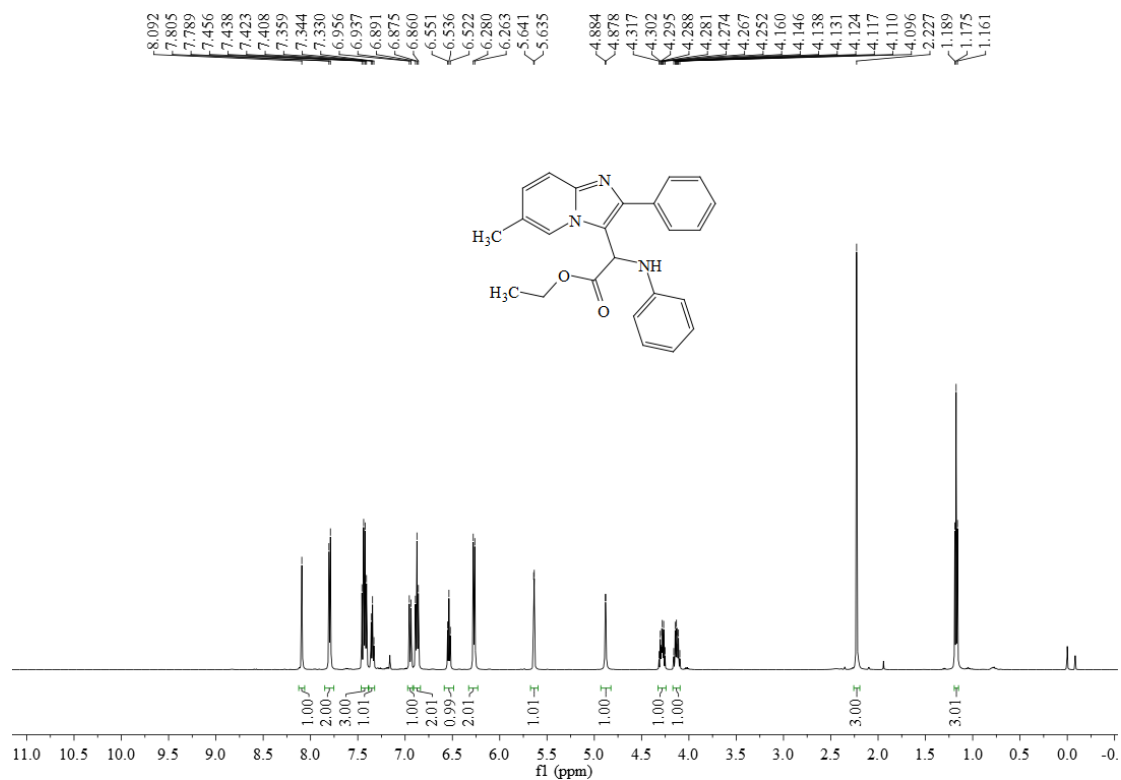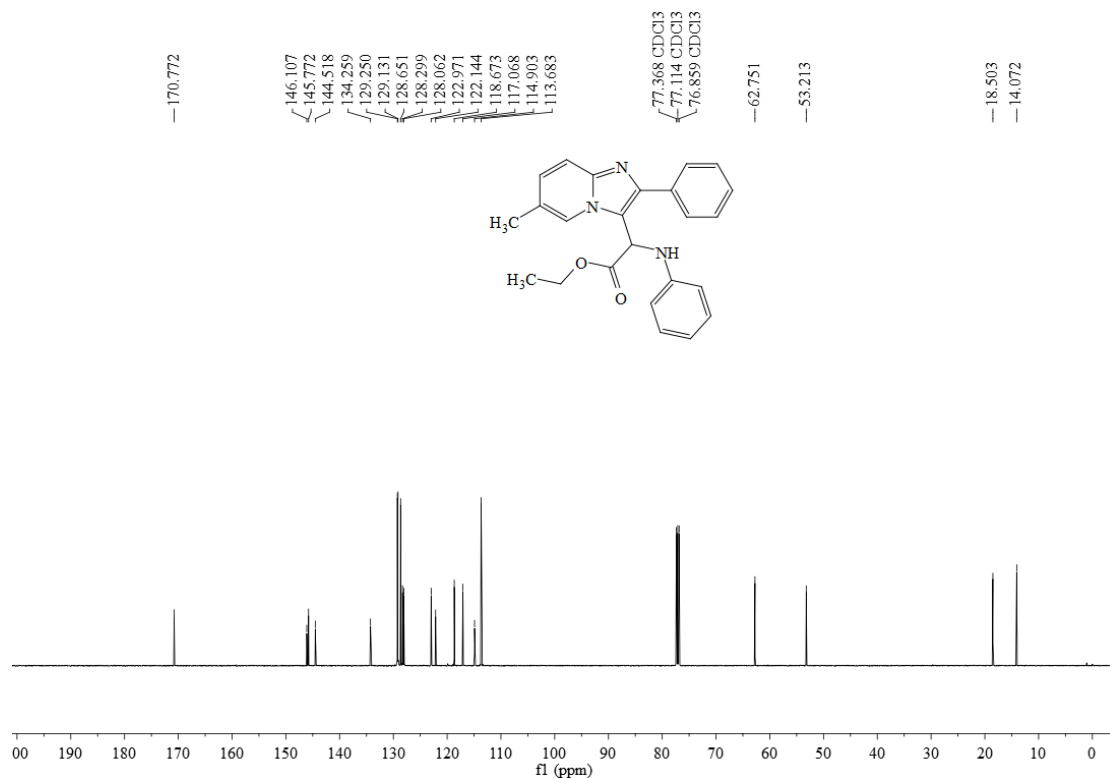

ethyl 2-(6-fluoro-2-phenylimidazo[1,2-a]pyridin-3-yl)-2-(phenylamino)acetate (5)

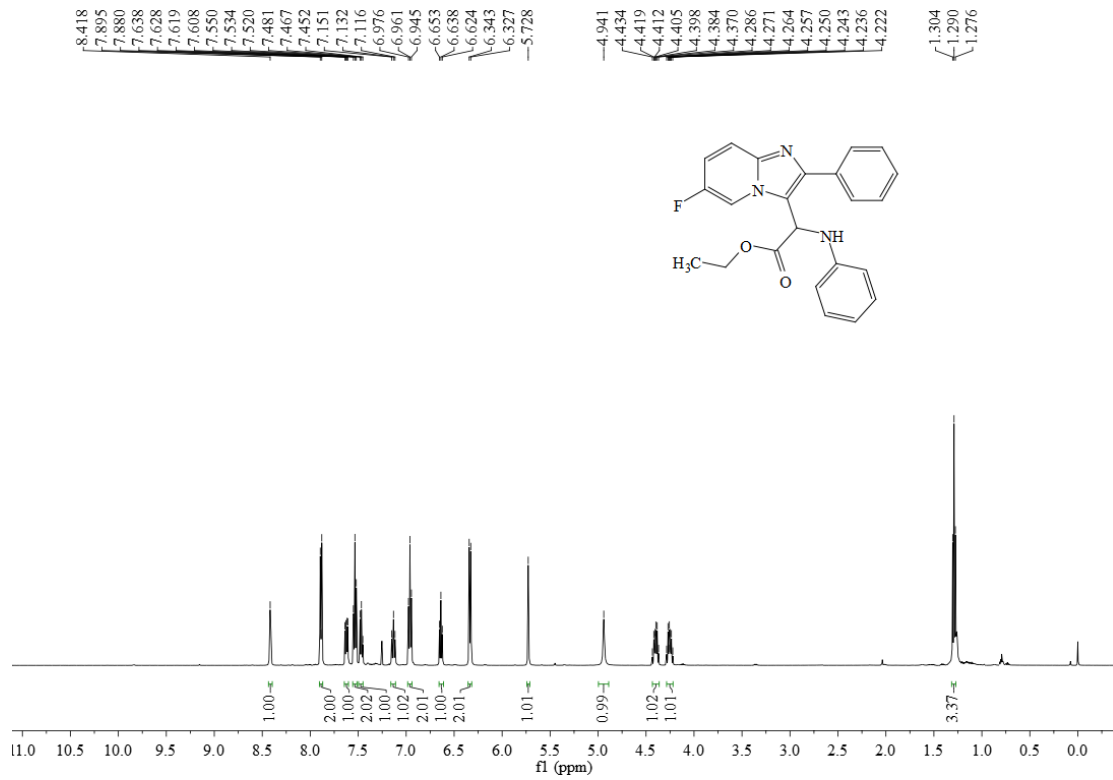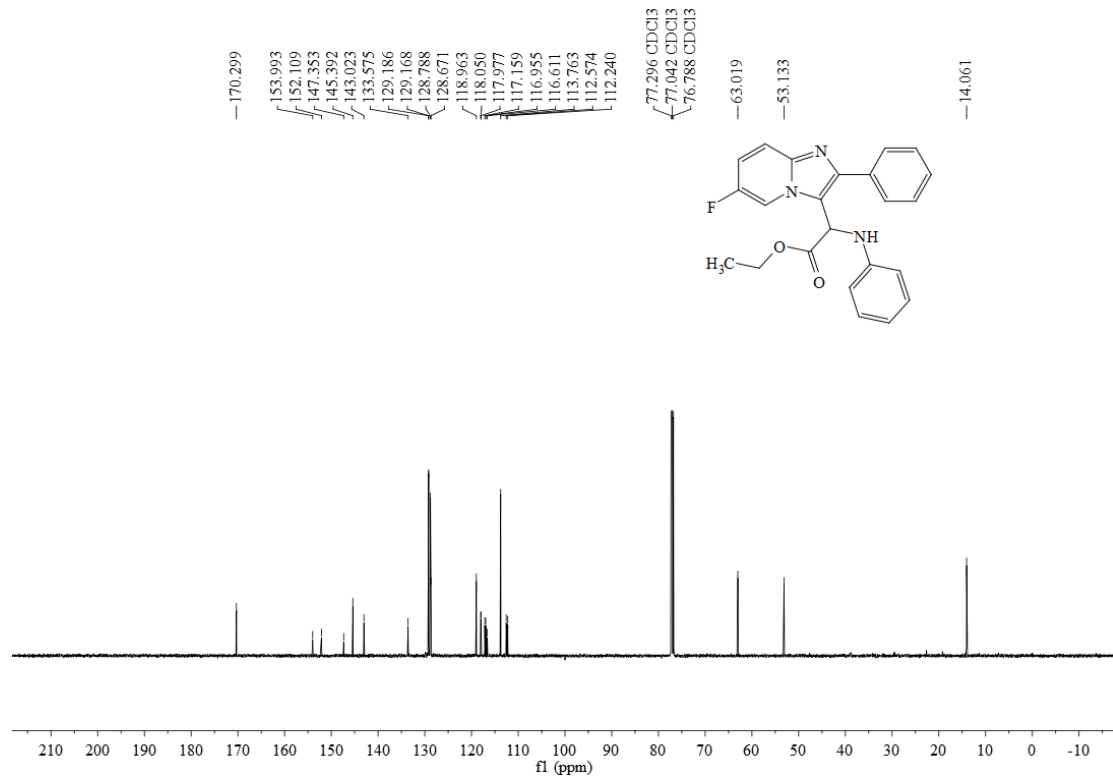

ethyl 2-(8-chloro-2-phenylimidazo[1,2-a]pyridin-3-yl)-2-(phenylamino)acetate (6)

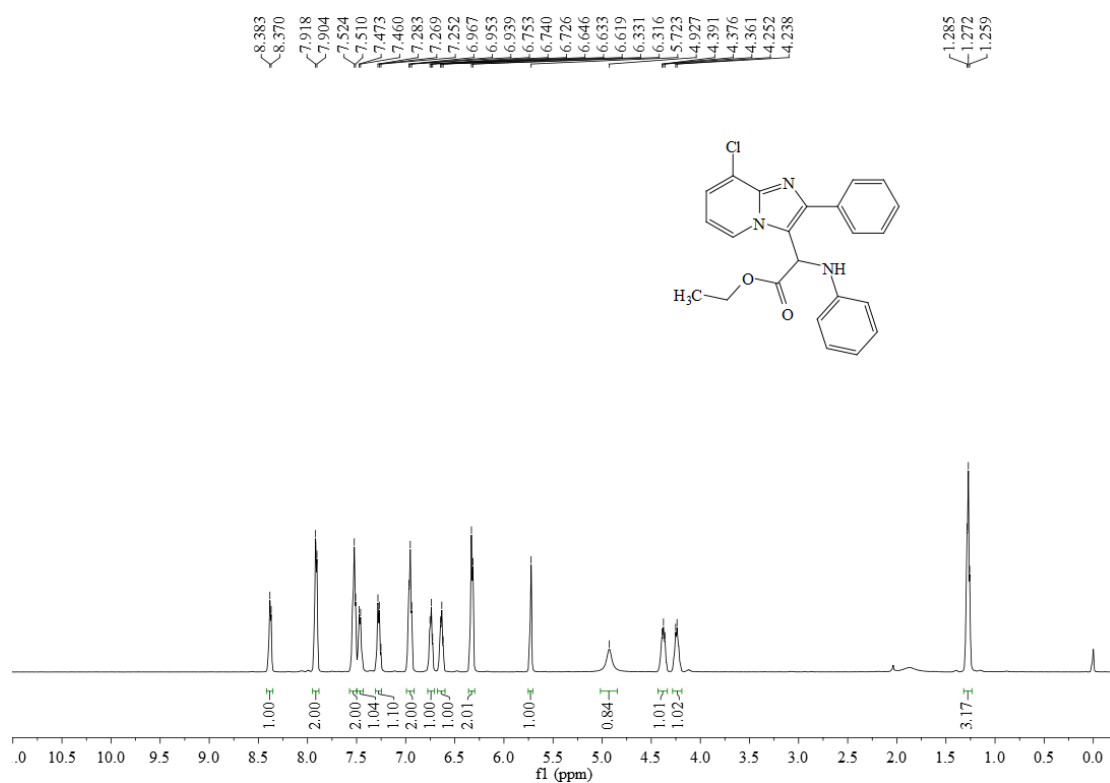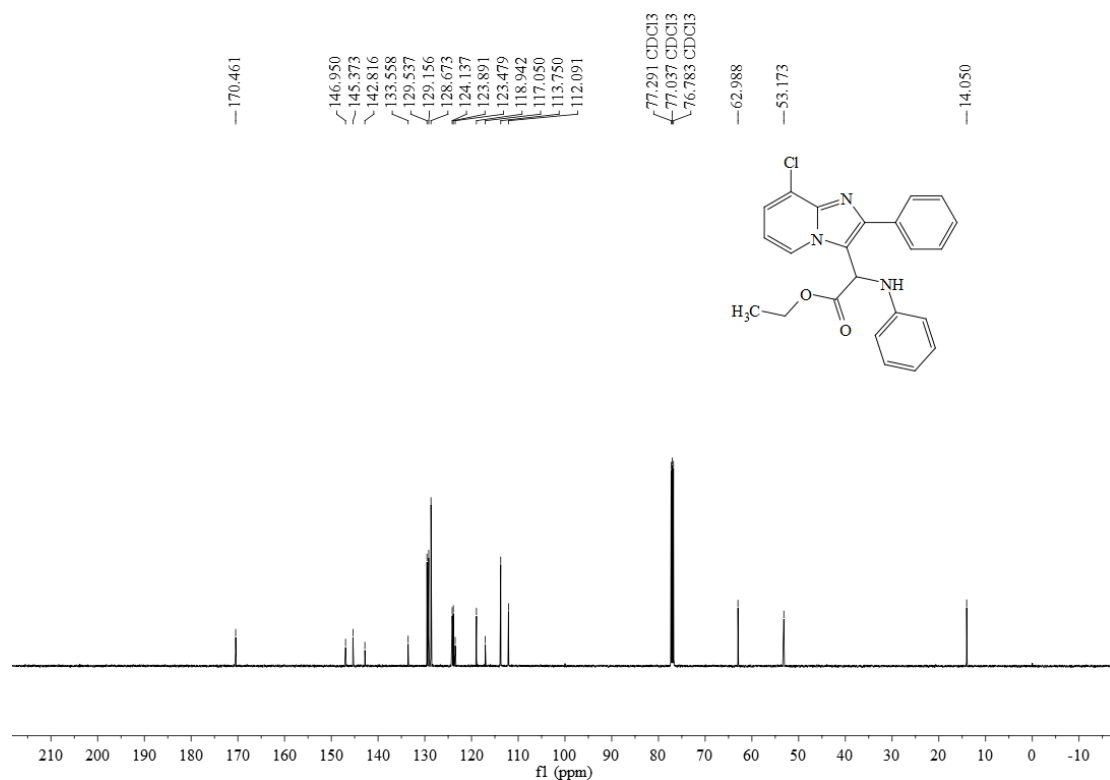

ethyl 2-(8-bromo-2-phenylimidazo[1,2-a]pyridin-3-yl)-2-(phenylamino)acetate (7)

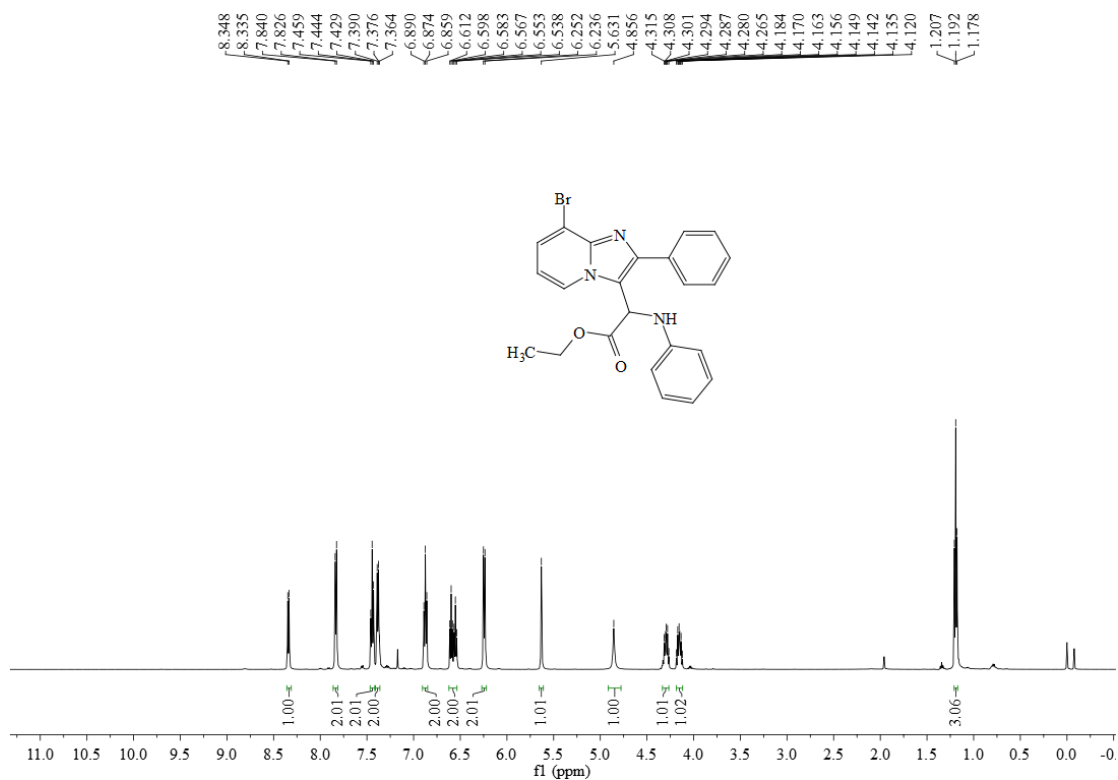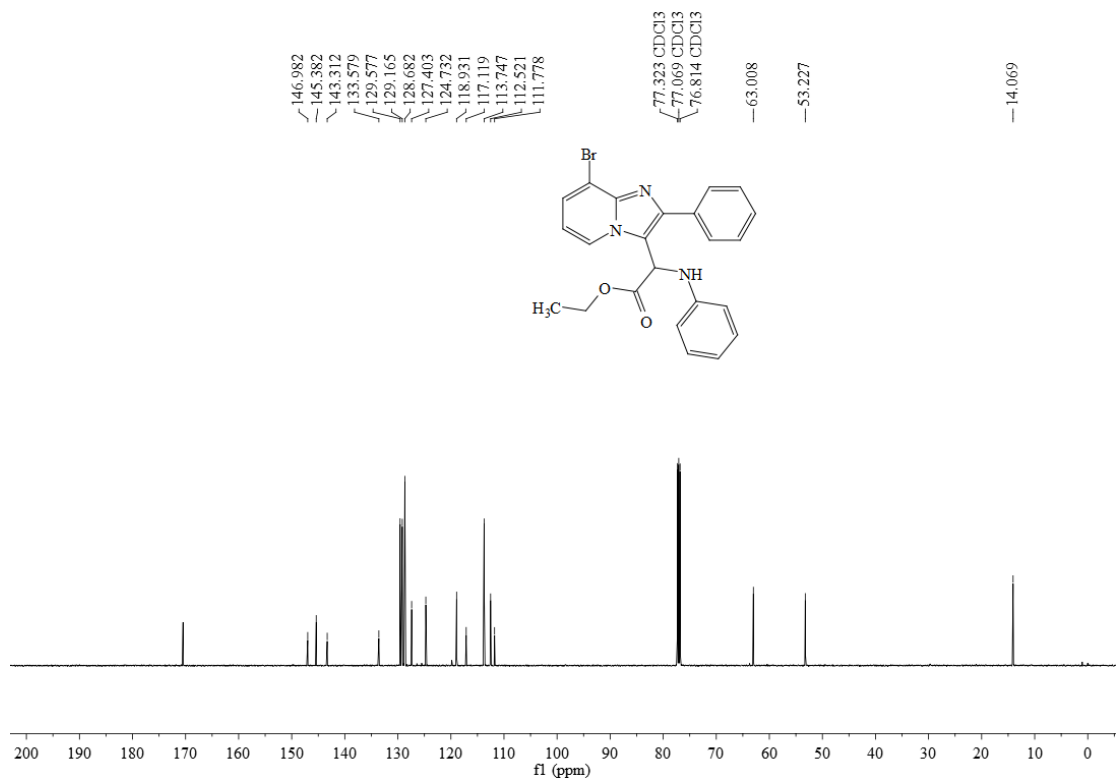

ethyl 2-(8-(hydroxymethyl)-2-phenylimidazo[1,2-a]pyridin-3-yl)-2-(phenylamino)acetate (8)

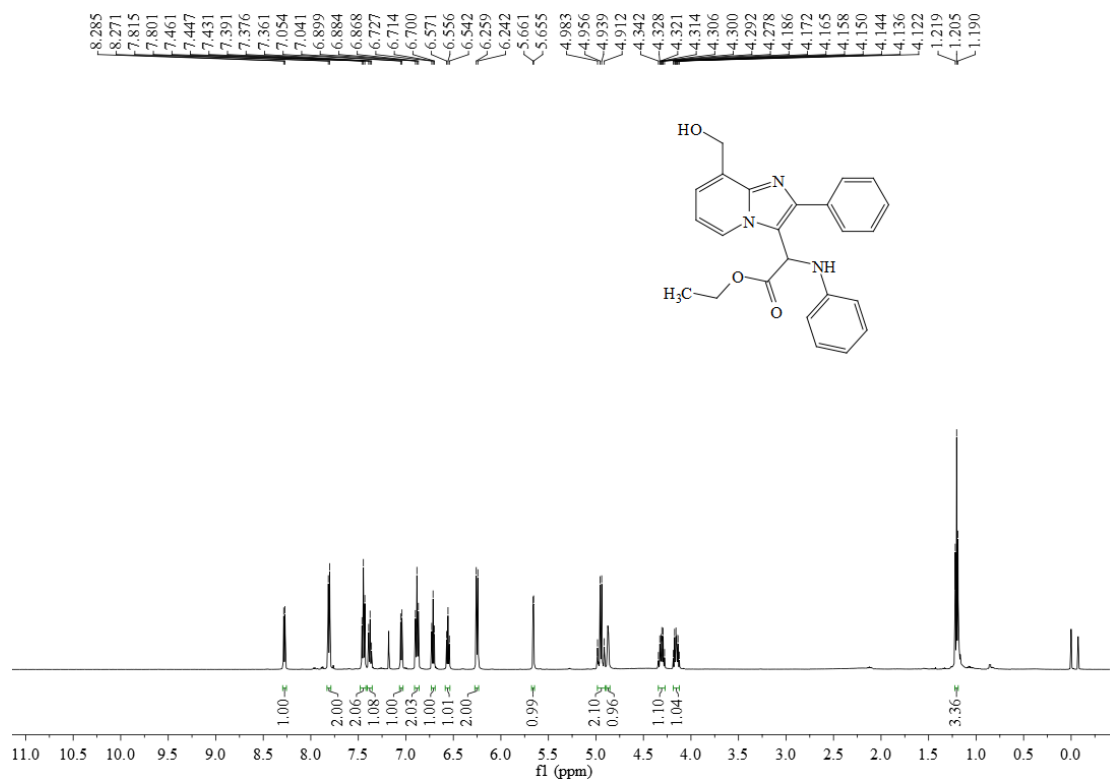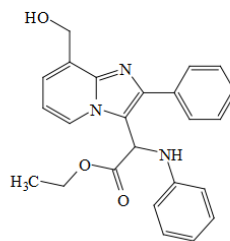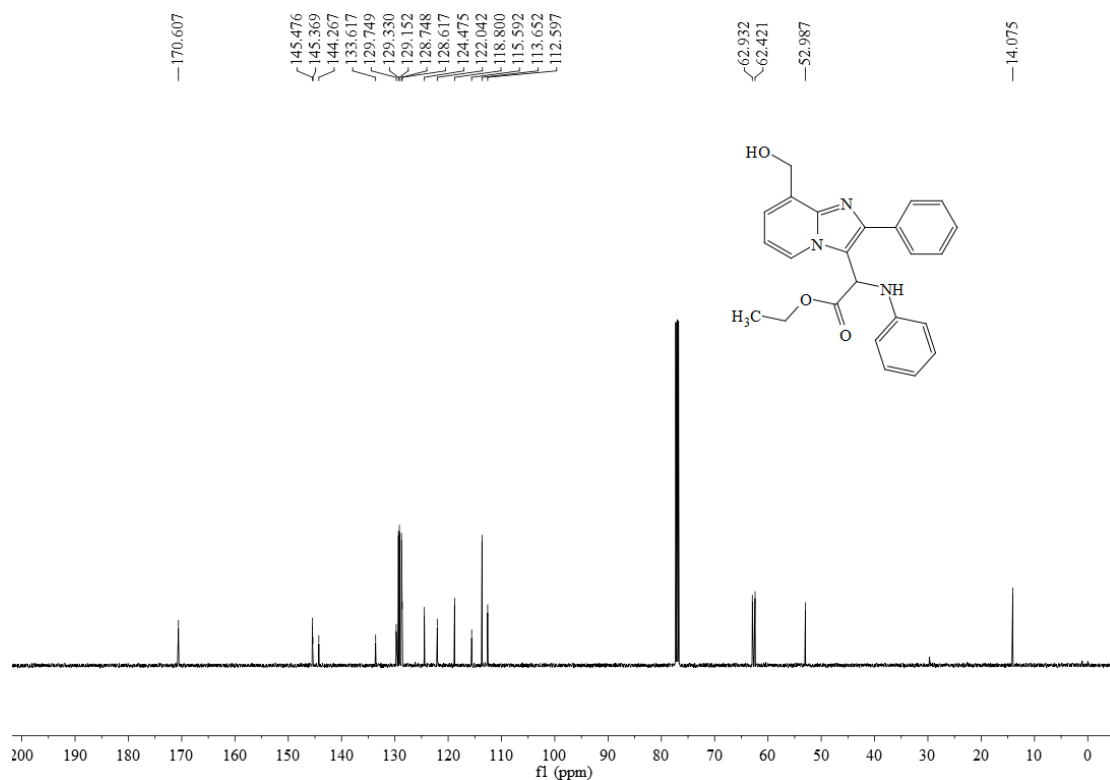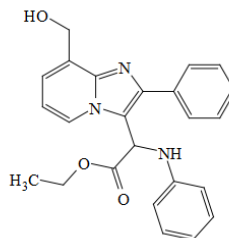

ethyl 2-(phenylamino)-2-(2-(p-tolyl)imidazo[1,2-a]pyridin-3-yl)acetate (9)

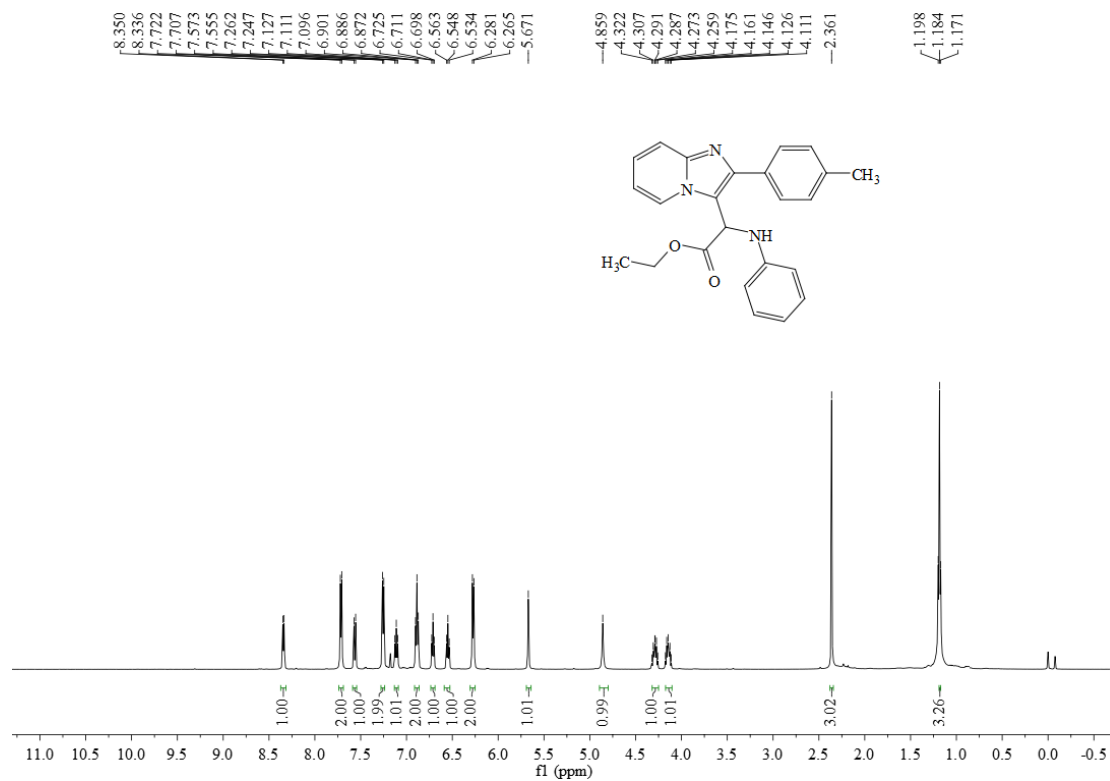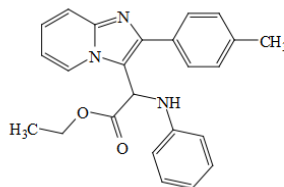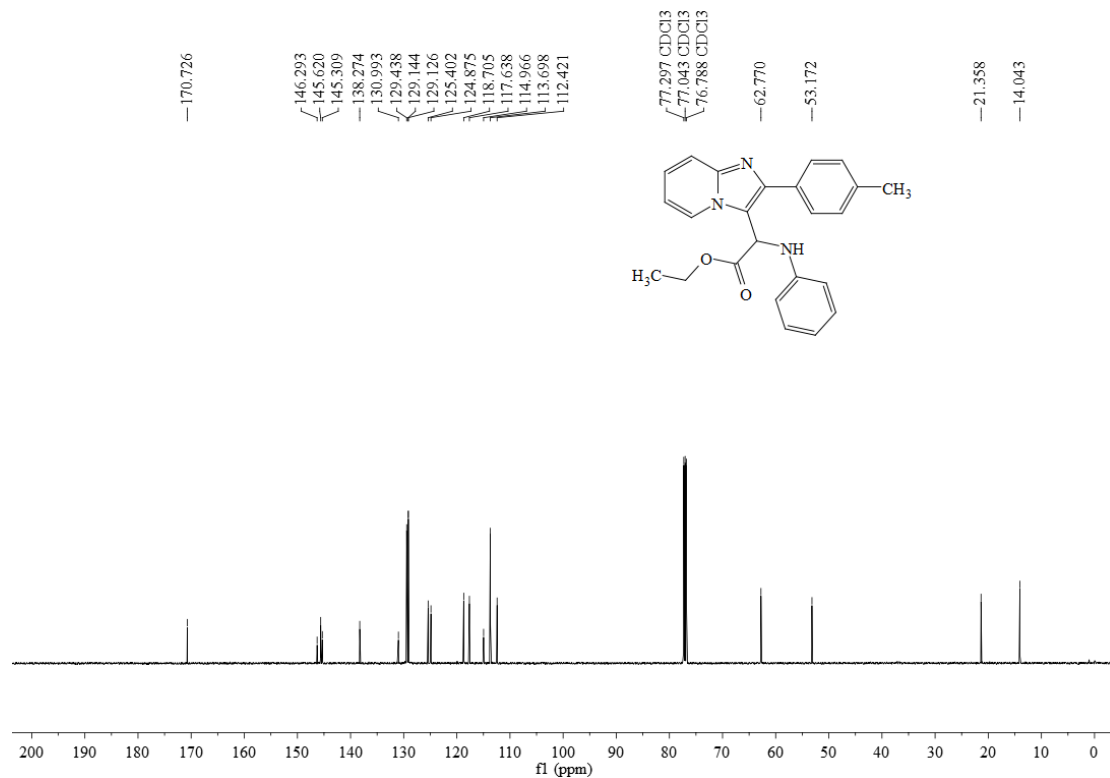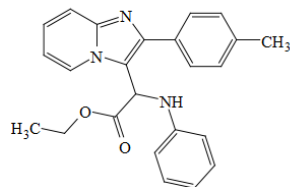



ethyl 2-(2-(4-methoxyphenyl)imidazo[1,2-a]pyridin-3-yl)-2-(phenylamino)acetate (10)

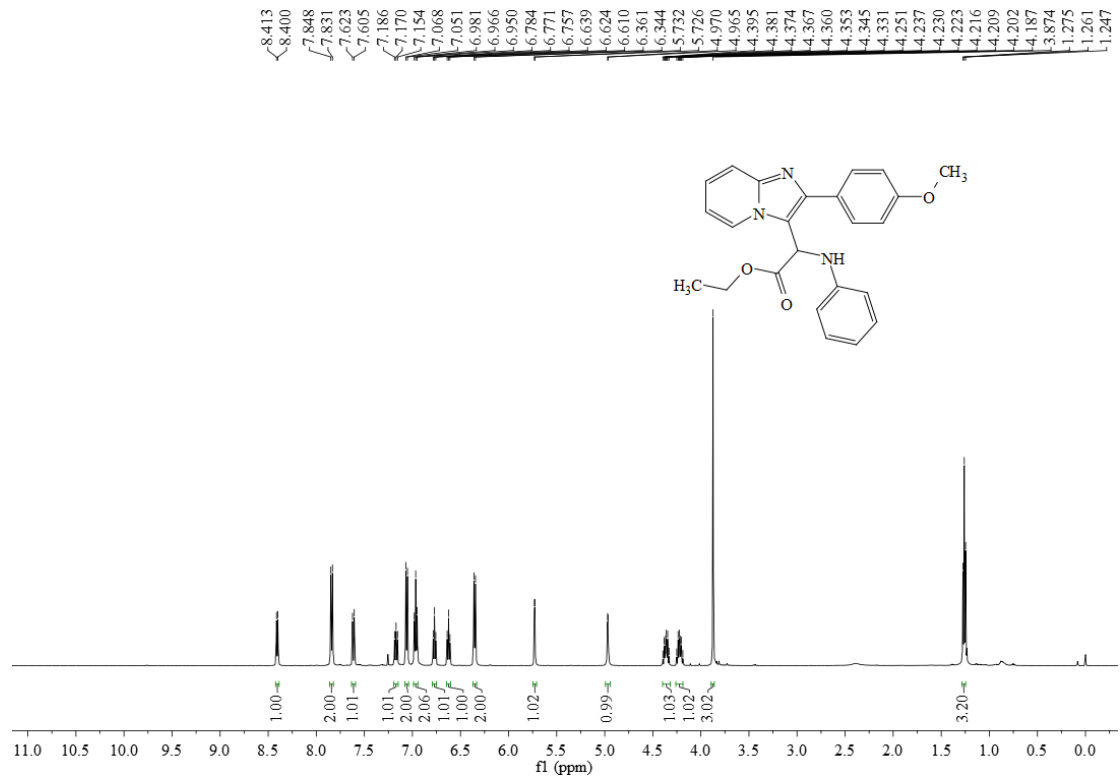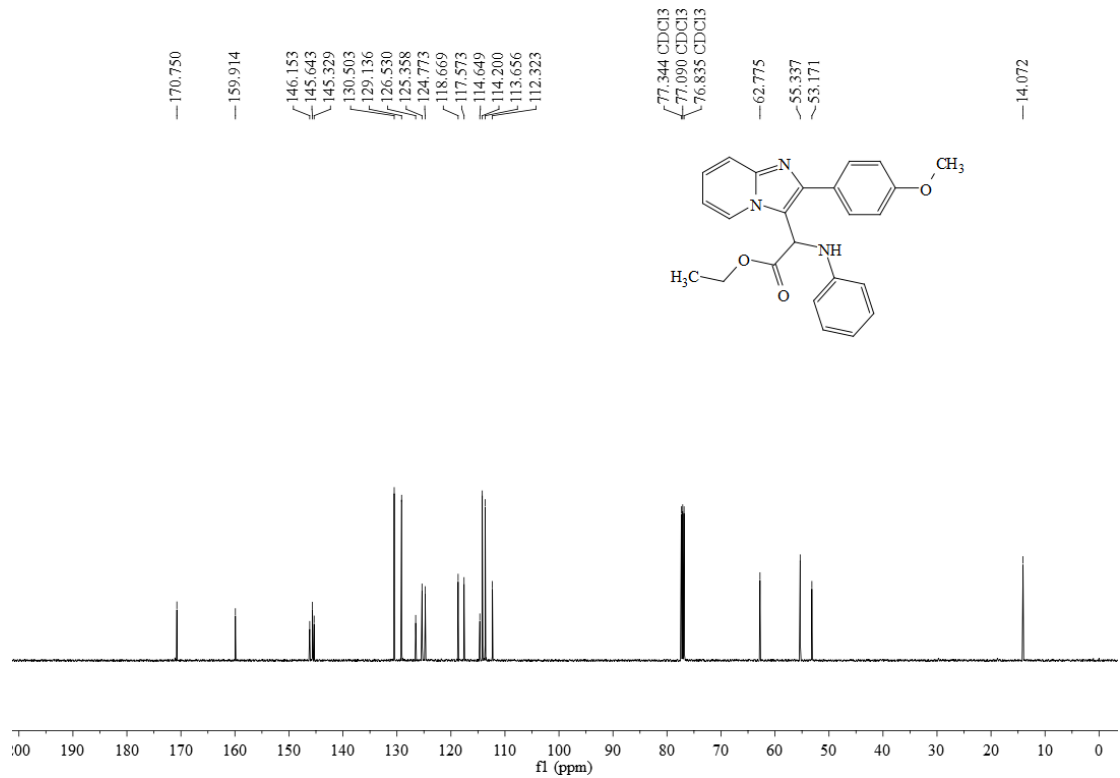

ethyl 2-(2-(4-fluorophenyl)imidazo[1,2-a]pyridin-3-yl)-2-(phenylamino)acetate (11)

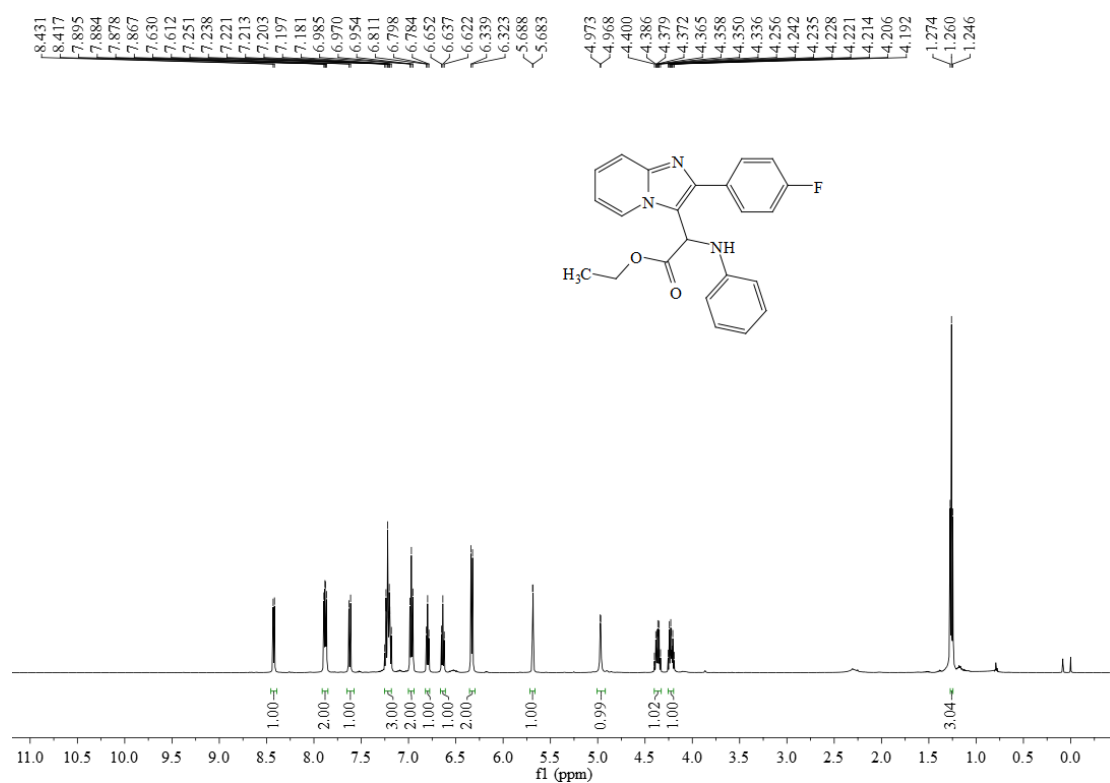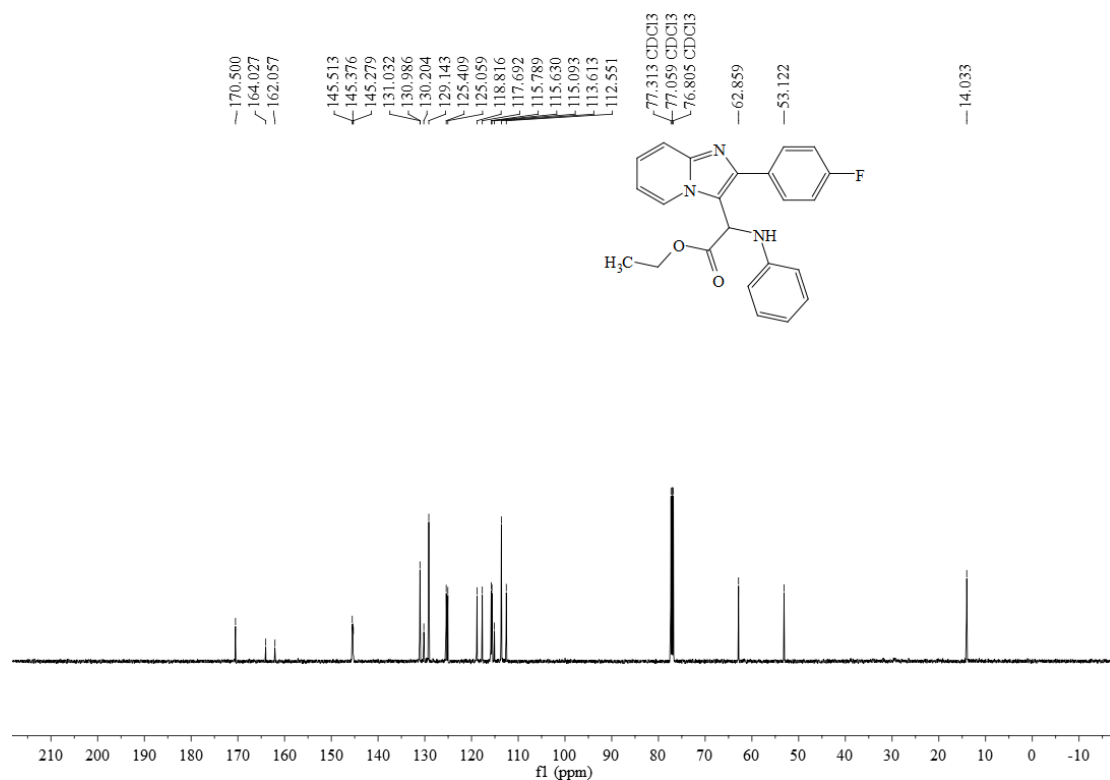

ethyl 2-(2-(4-chlorophenyl)imidazo[1,2-a]pyridin-3-yl)-2-(phenylamino)acetate (12)

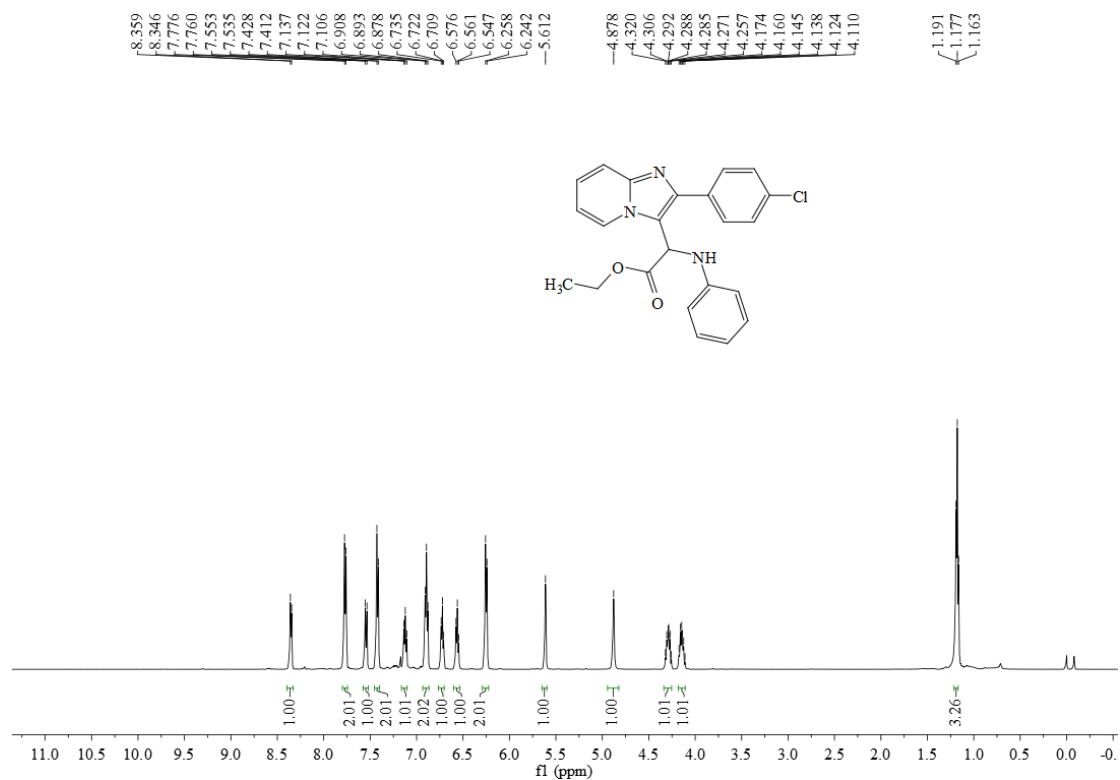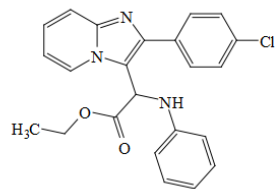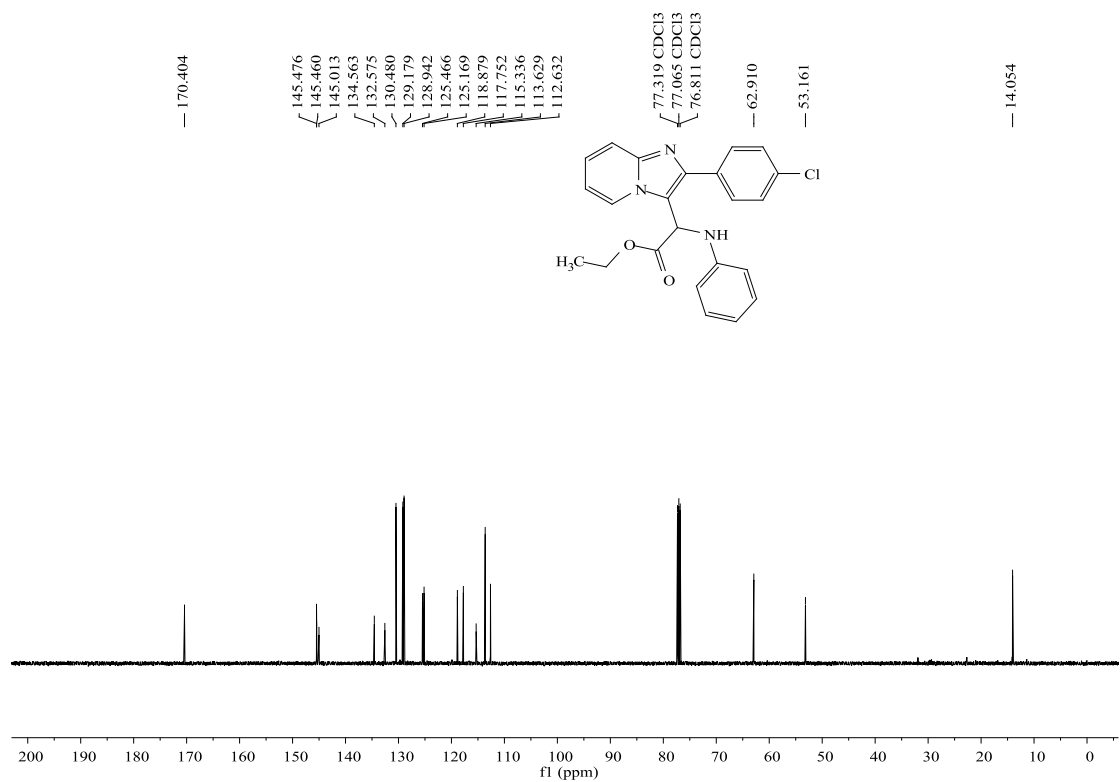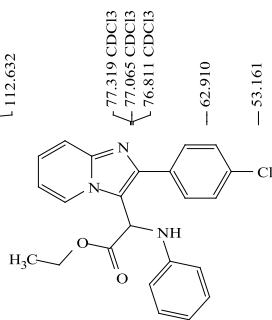

ethyl 2-(2-(4-bromophenyl)imidazo[1,2-a]pyridin-3-yl)-2-(phenylamino)acetate (13)

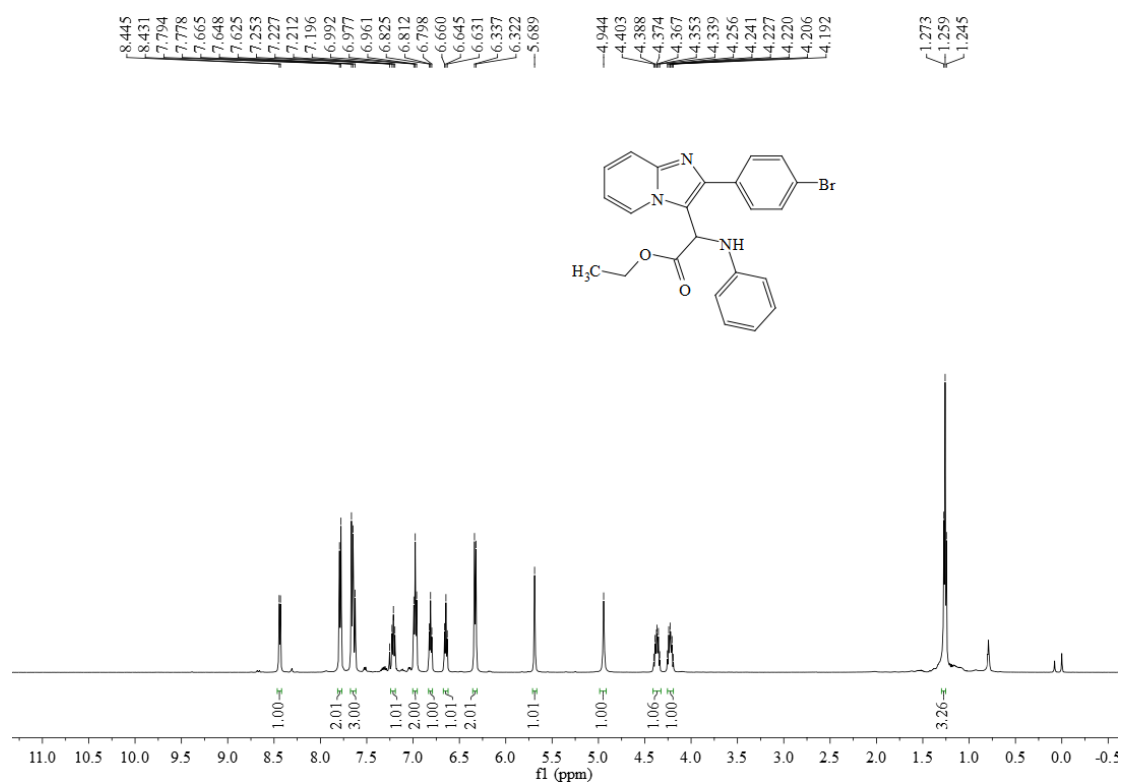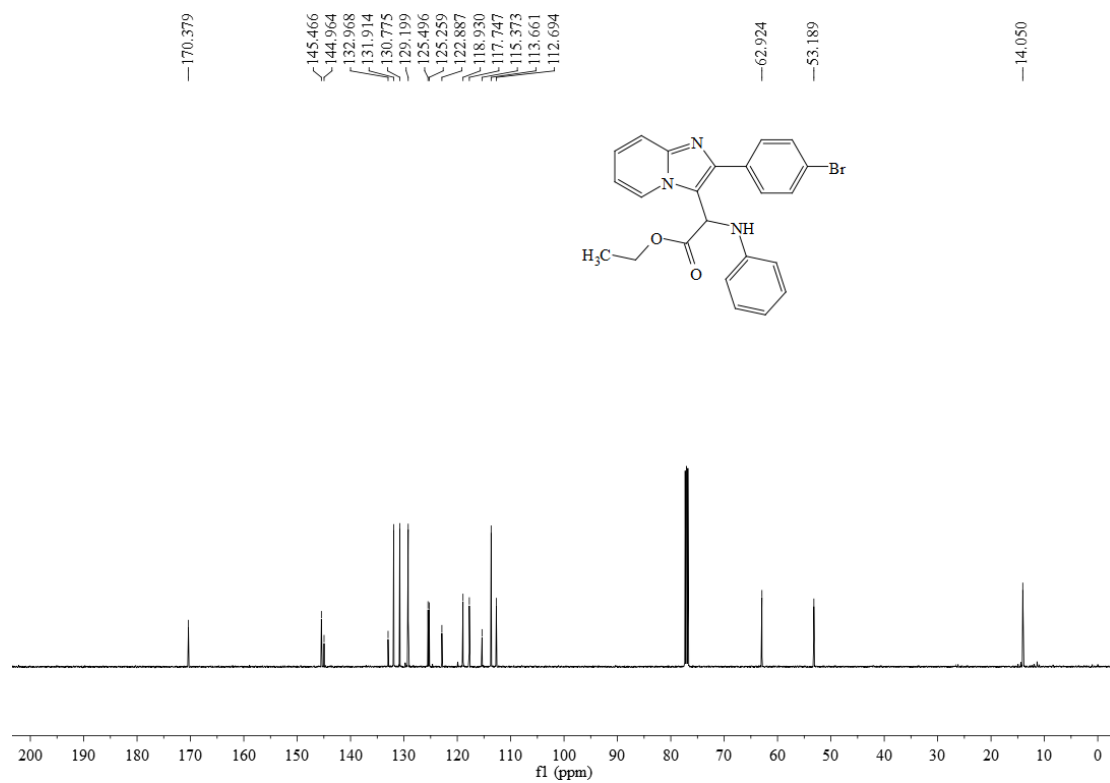

ethyl 2-(2-(4-cyanophenyl)-7-methylimidazo[1,2-a]pyridin-3-yl)-2-(phenylamino)acetate (14)

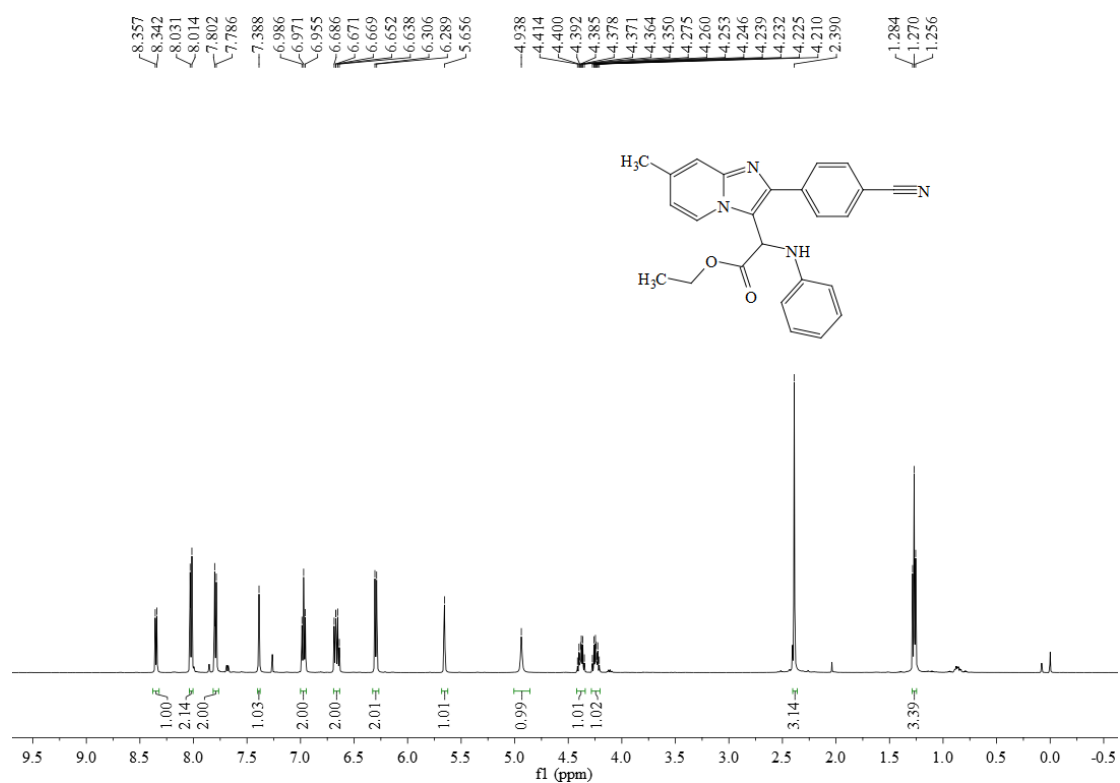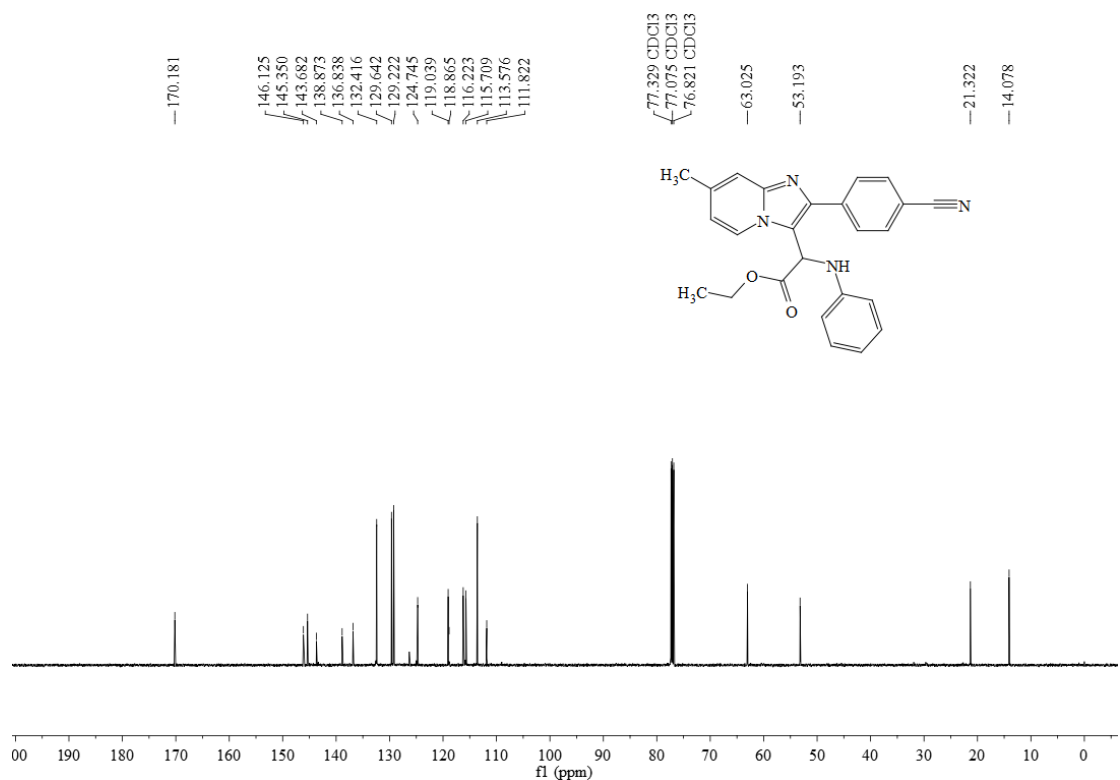

ethyl 2-(2-([1,1'-biphenyl]-4-yl)imidazo[1,2-a]pyridin-3-yl)-2-(phenylamino)acetate (15)

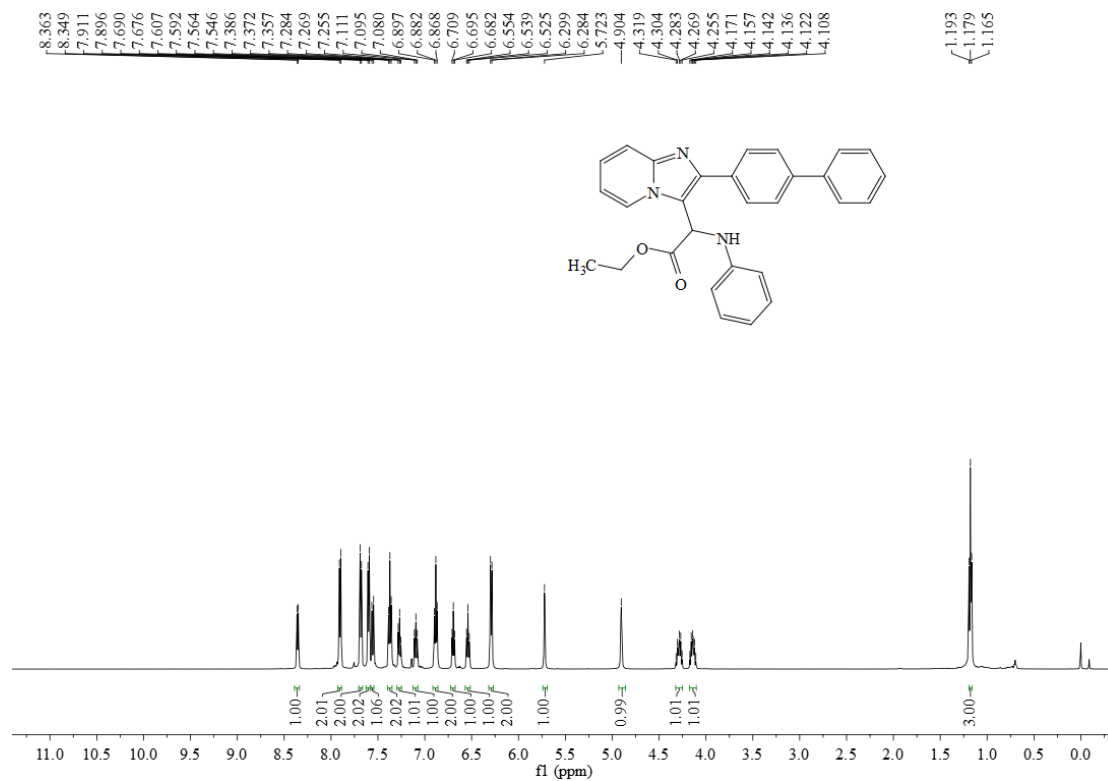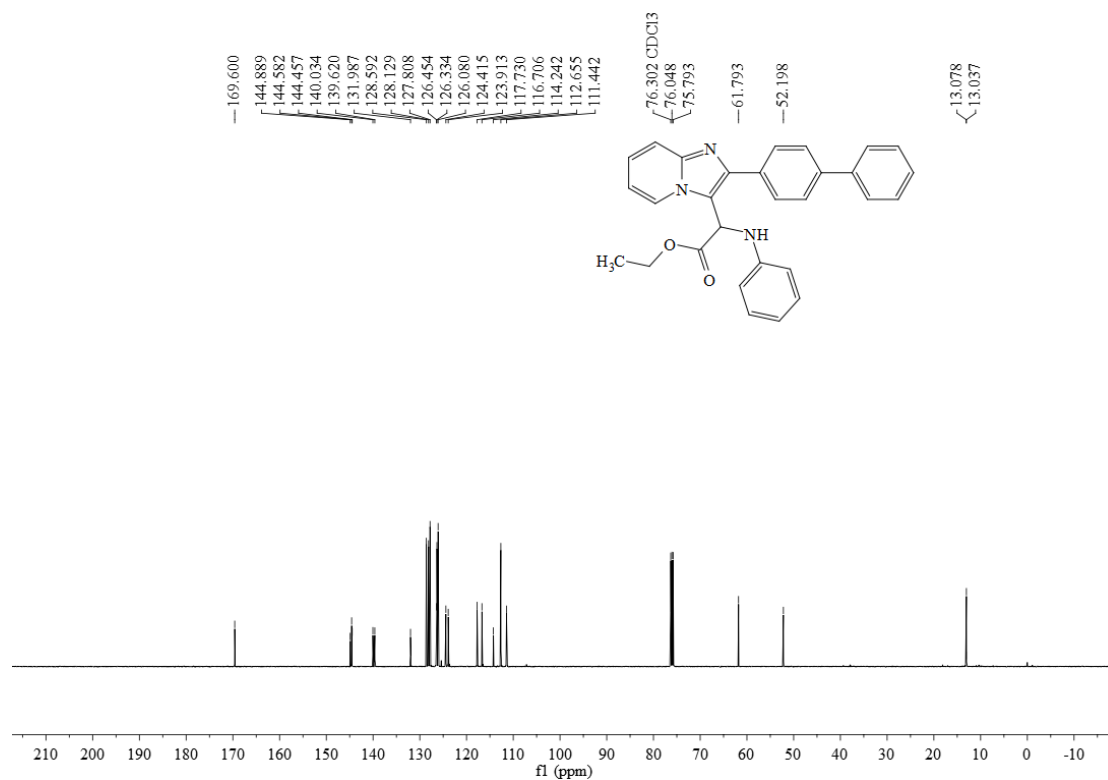

ethyl 2-(2-ethylimidazo[1,2-a]pyridin-3-yl)-2-(phenylamino)acetate (16)

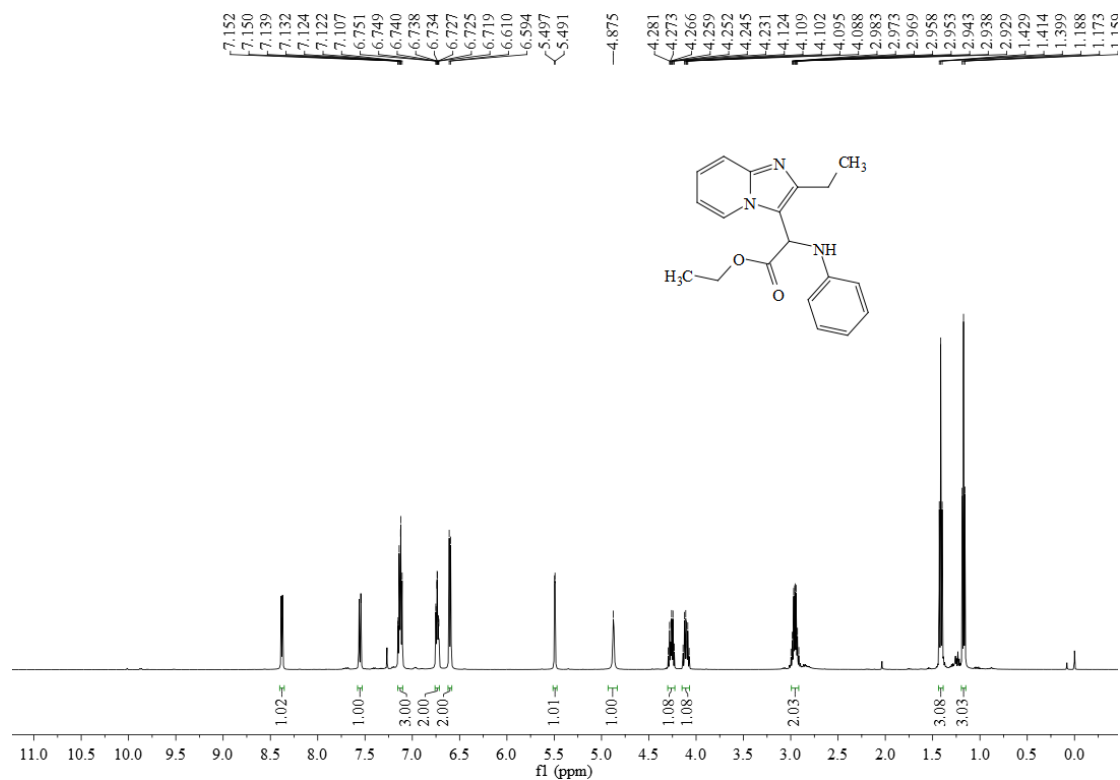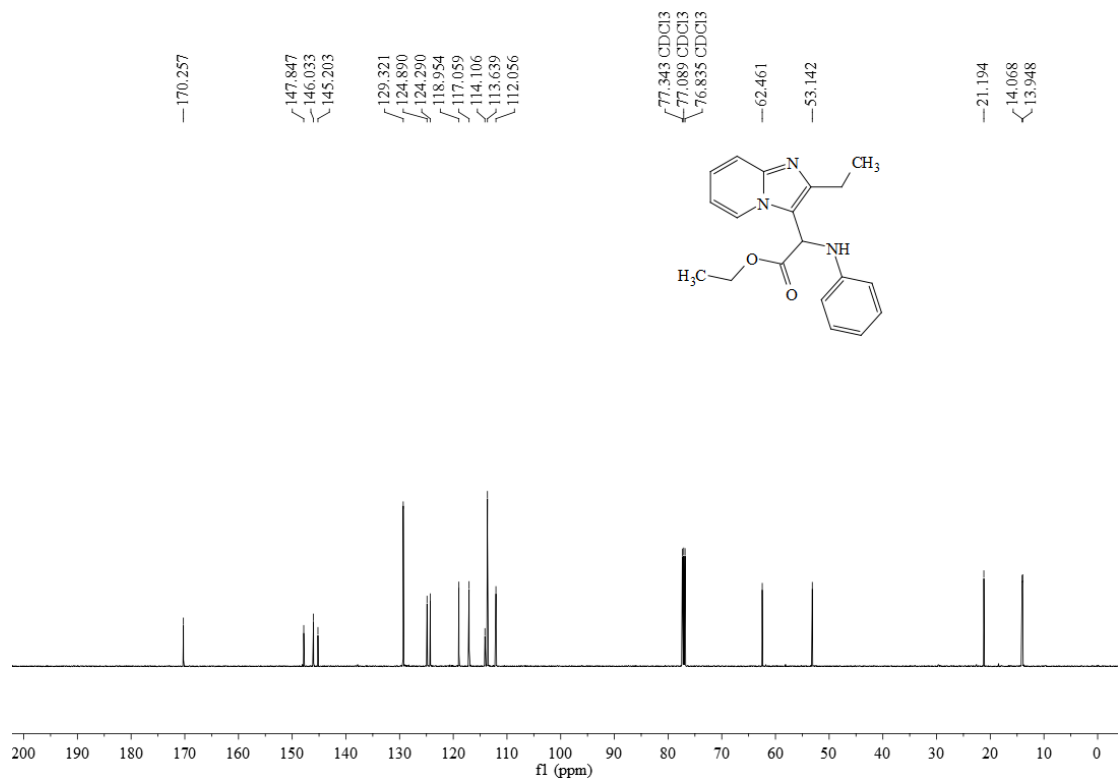

ethyl 2-(2-phenylimidazo[1,2-a]pyridin-3-yl)-2-(p-tolylamino)acetate (17).

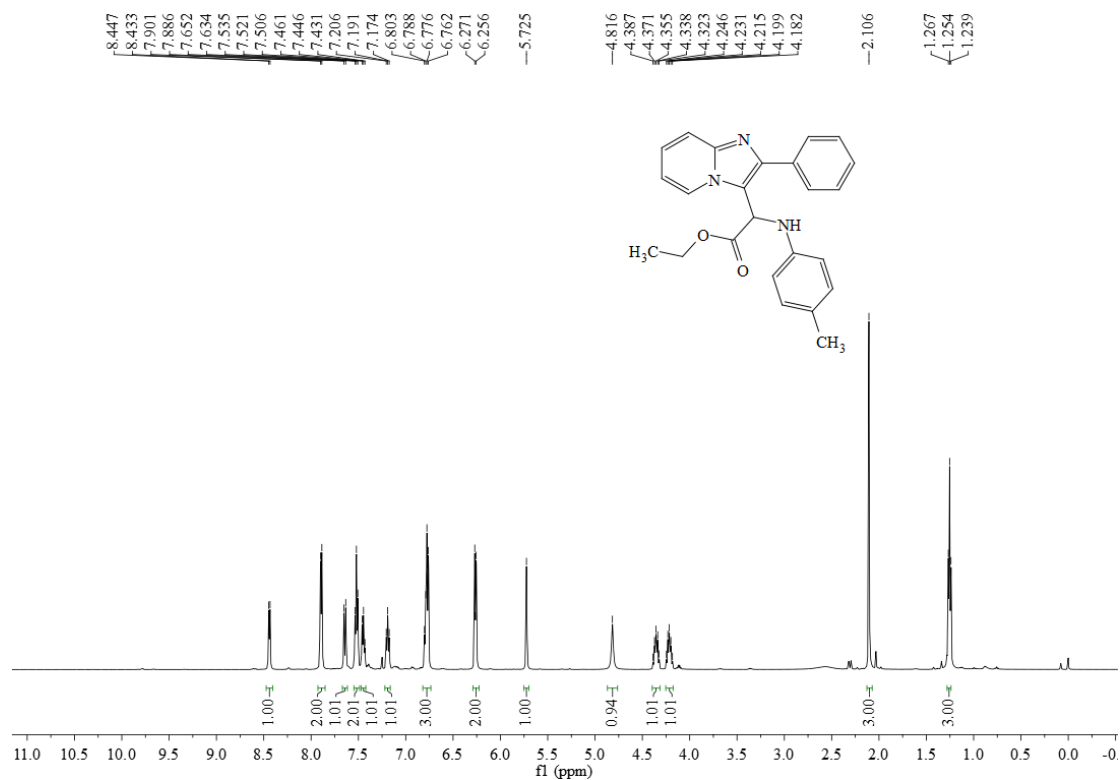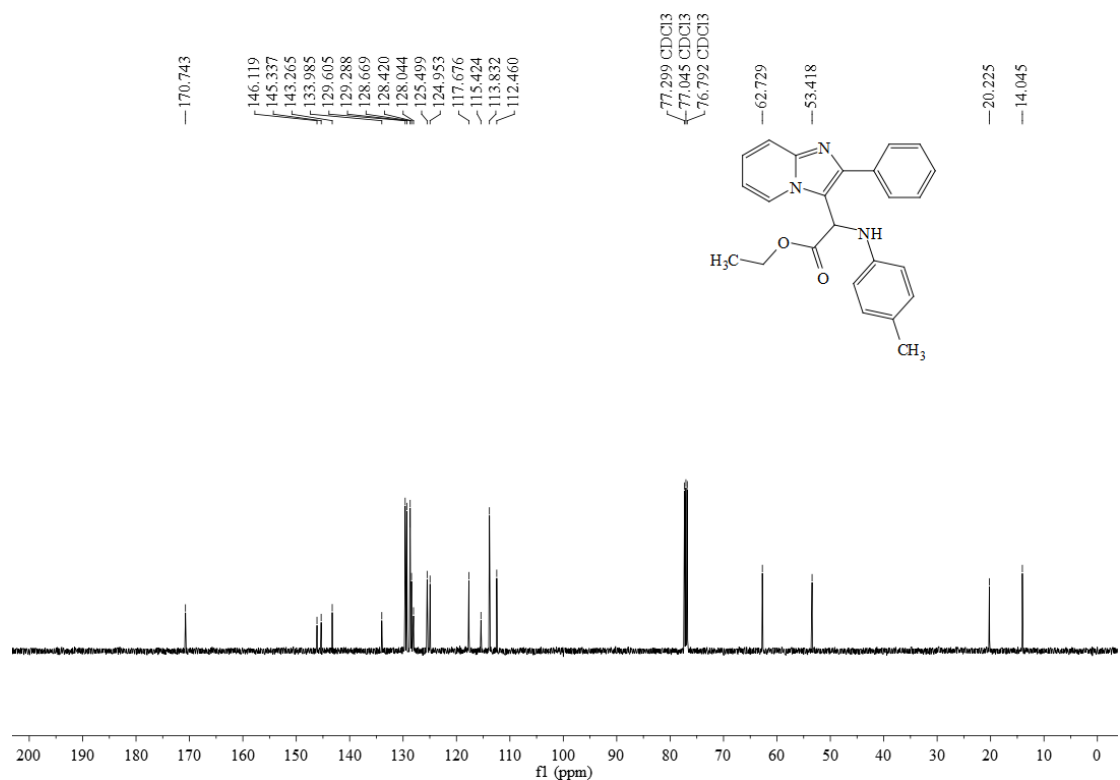



ethyl 2-((4-chlorophenyl)amino)-2-(2-phenylimidazo[1,2-a]pyridin-3-yl)acetate (18).

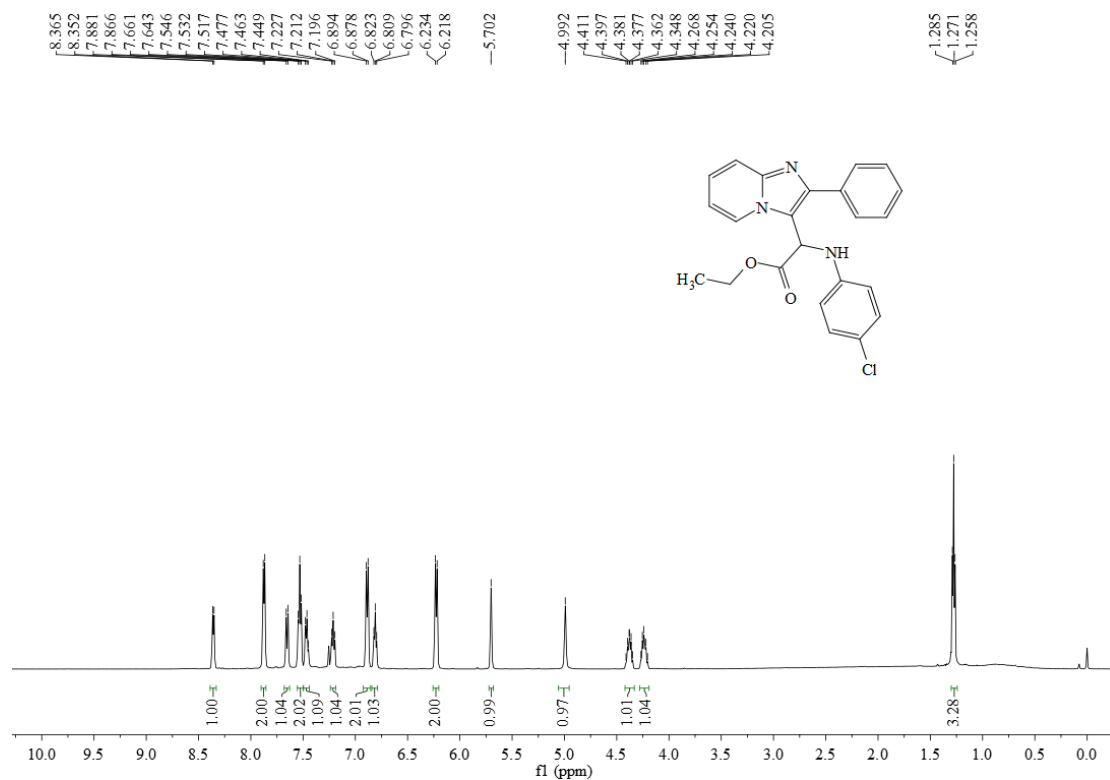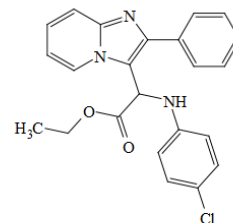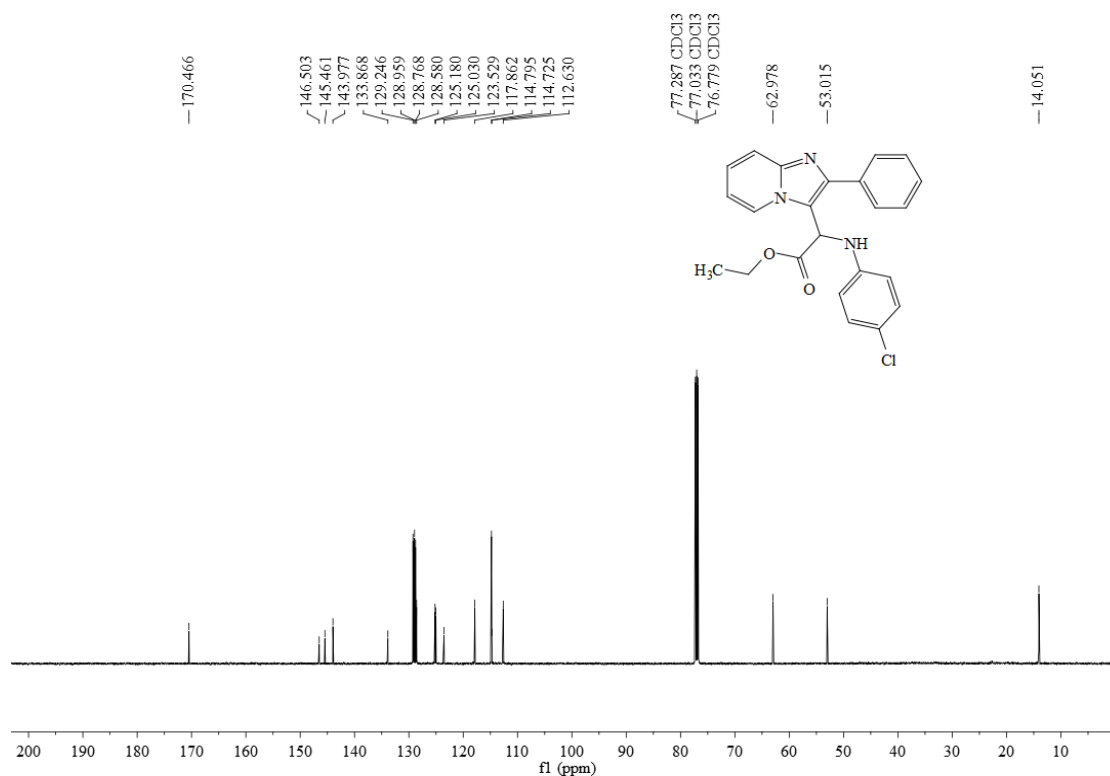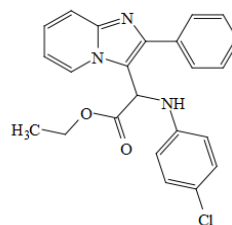

ethyl 2-((4-bromophenyl)amino)-2-(2-phenylimidazo[1,2-a]pyridin-3-yl)acetate (19).

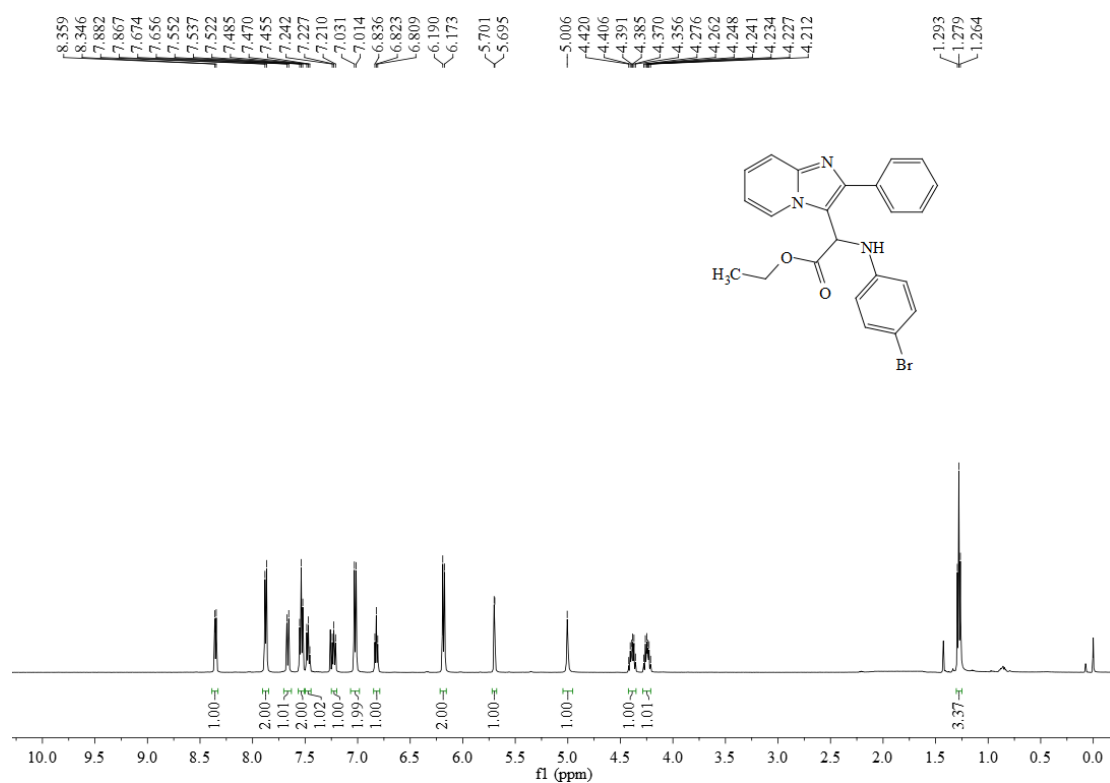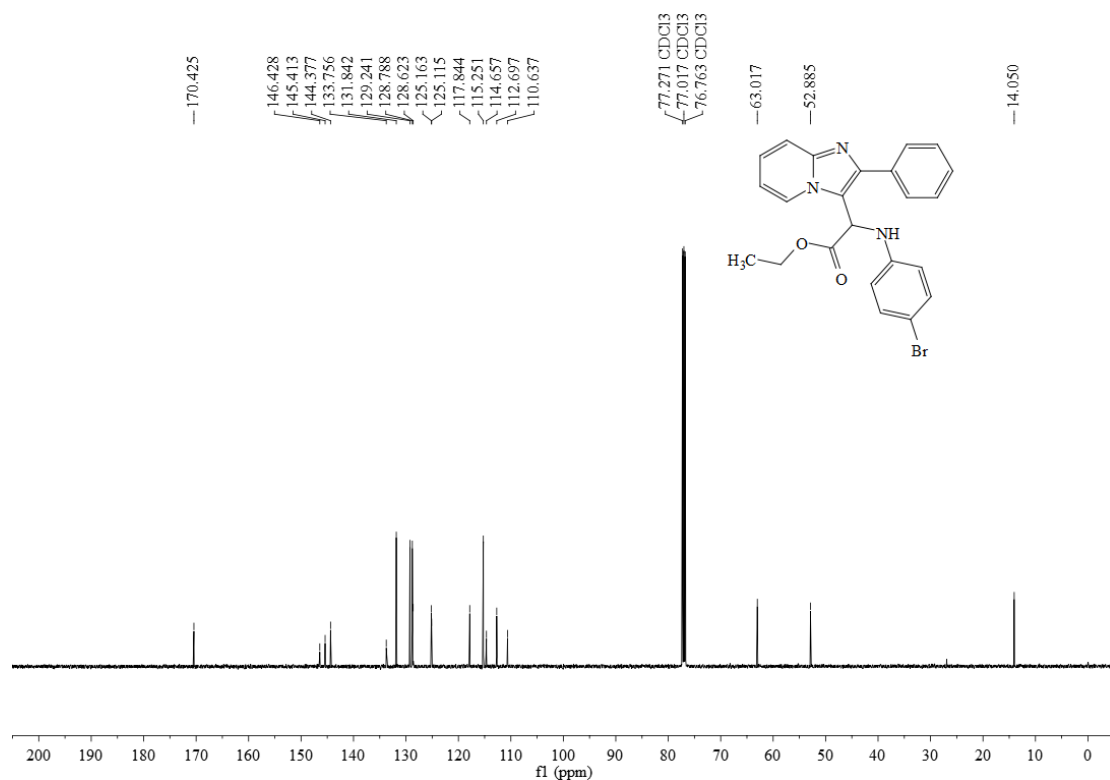

**ethyl 2-(phenylamino)-2-(6-phenylimidazo[2,1-b]thiazol-5-yl)acetate (20).**

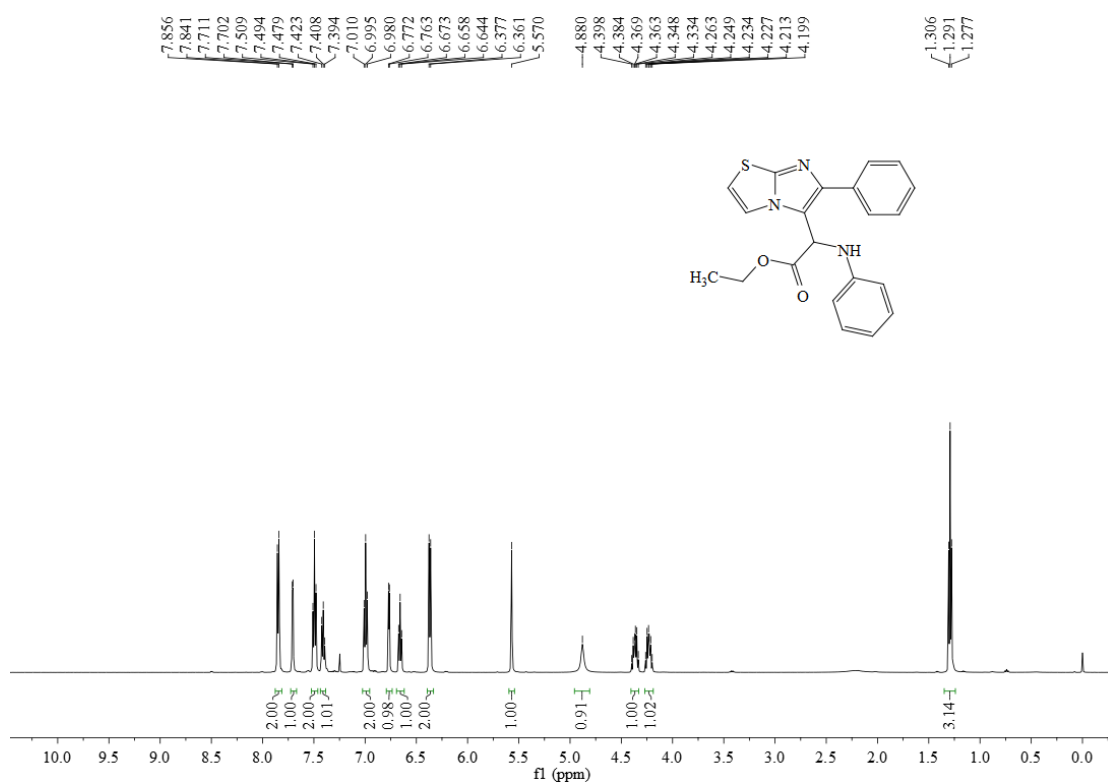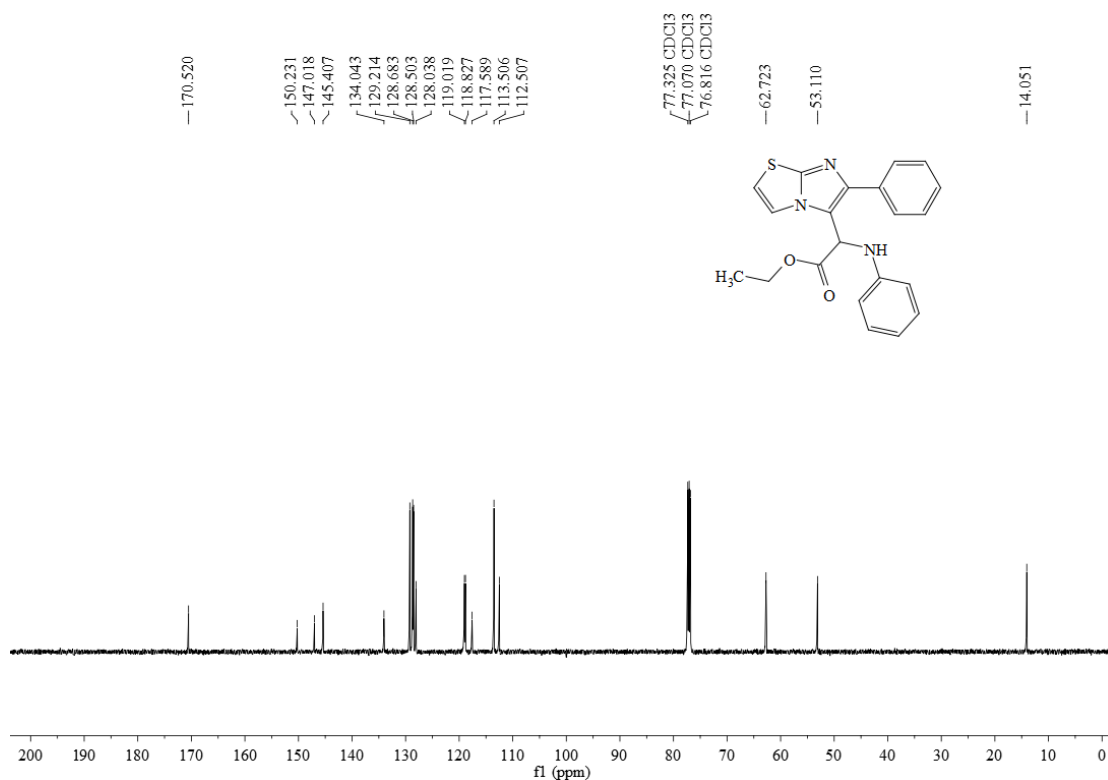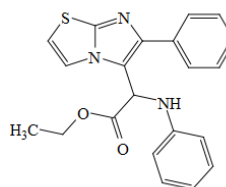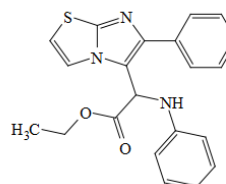

ethyl 2-(2-methyl-6-phenylimidazo[2,1-b]thiazol-5-yl)-2-(phenylamino)acetate (21).

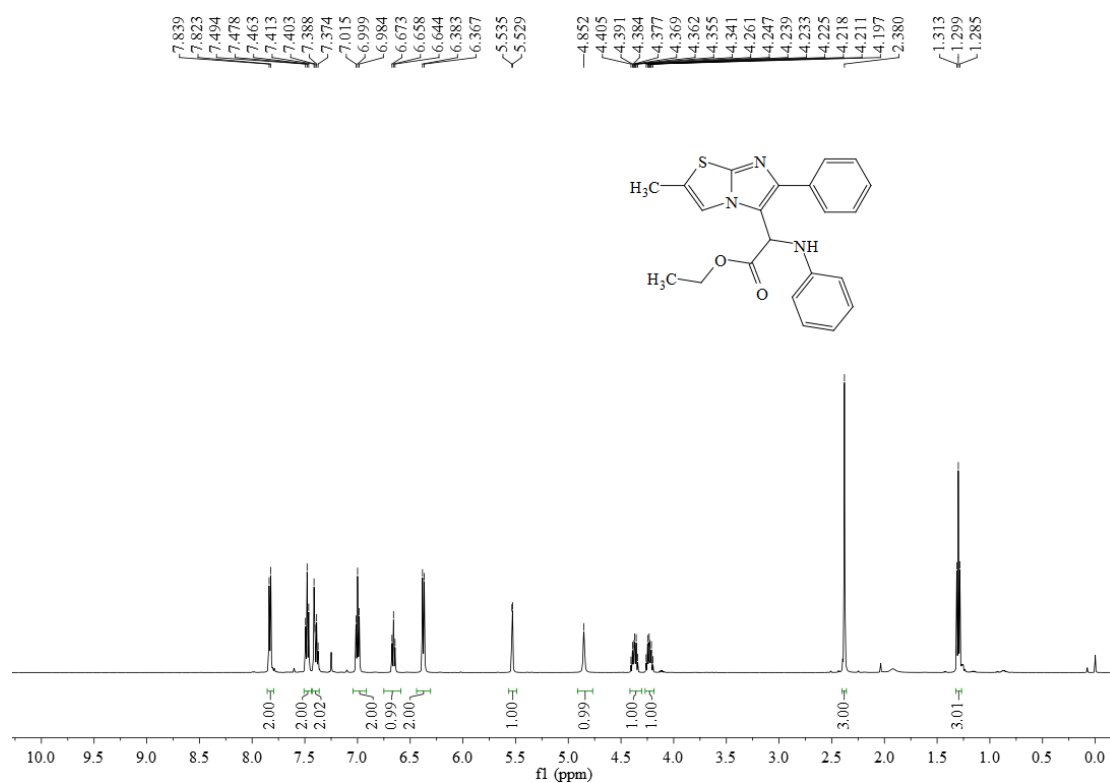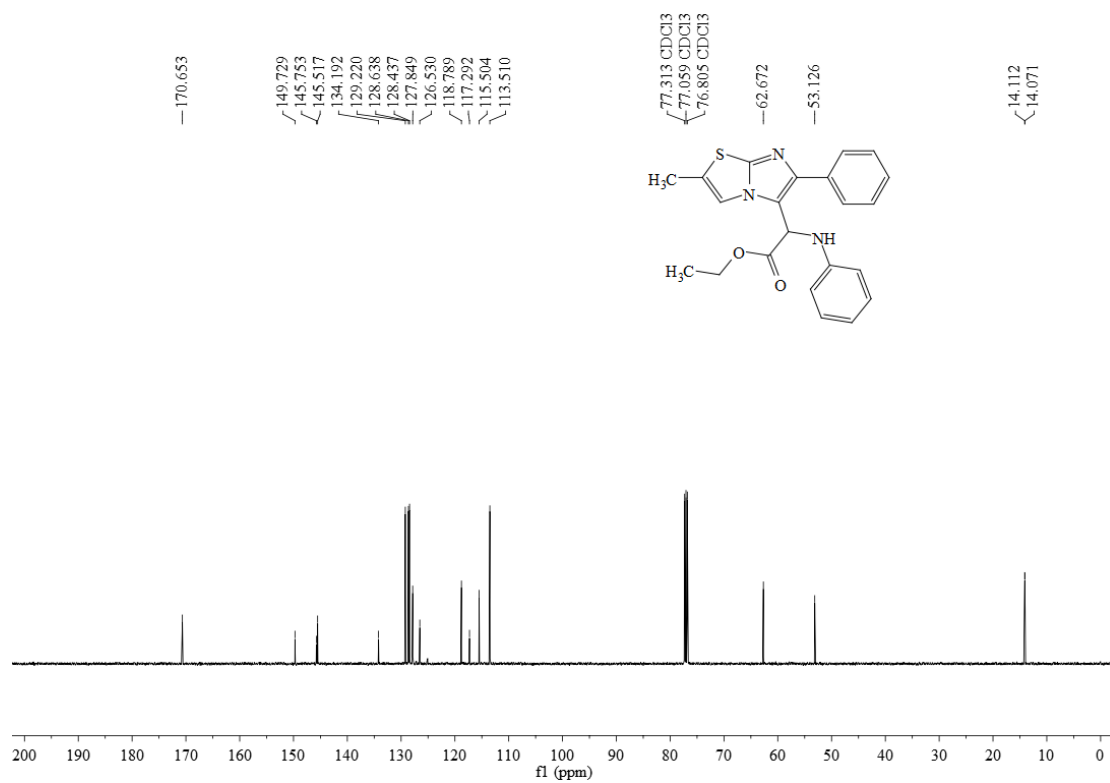

ethyl 2-(phenylamino)-2-(6-(p-tolyl)imidazo[2,1-b]thiazol-5-yl)acetate (22)

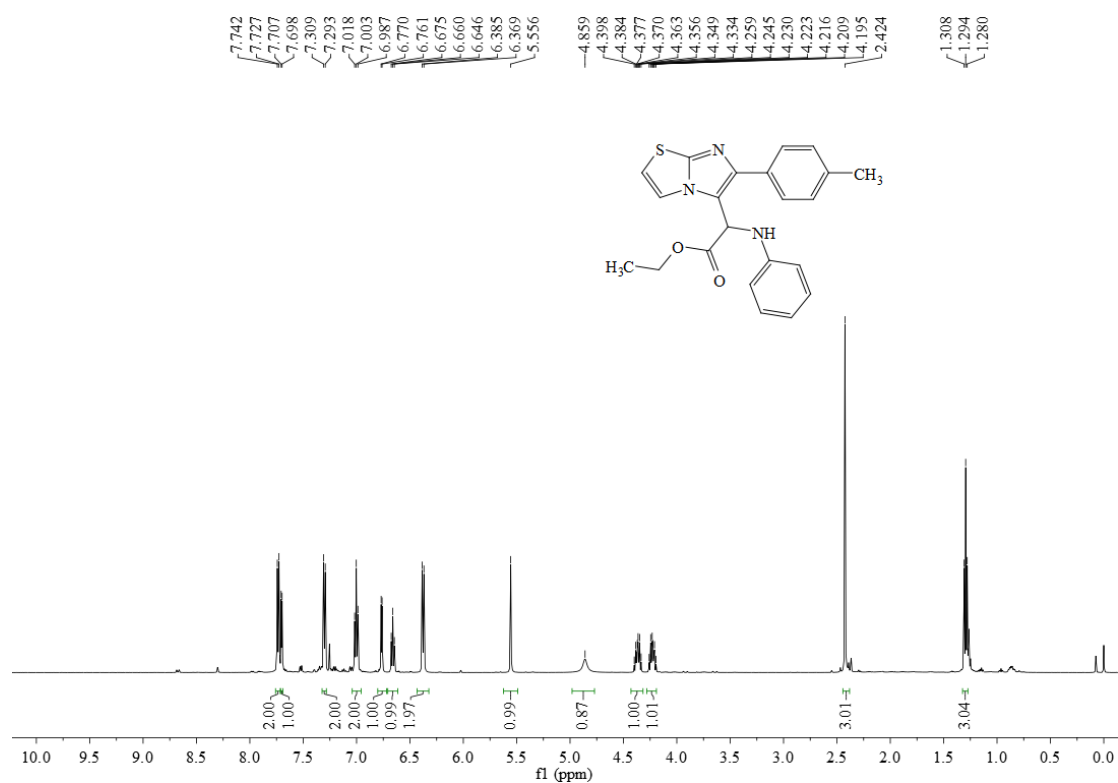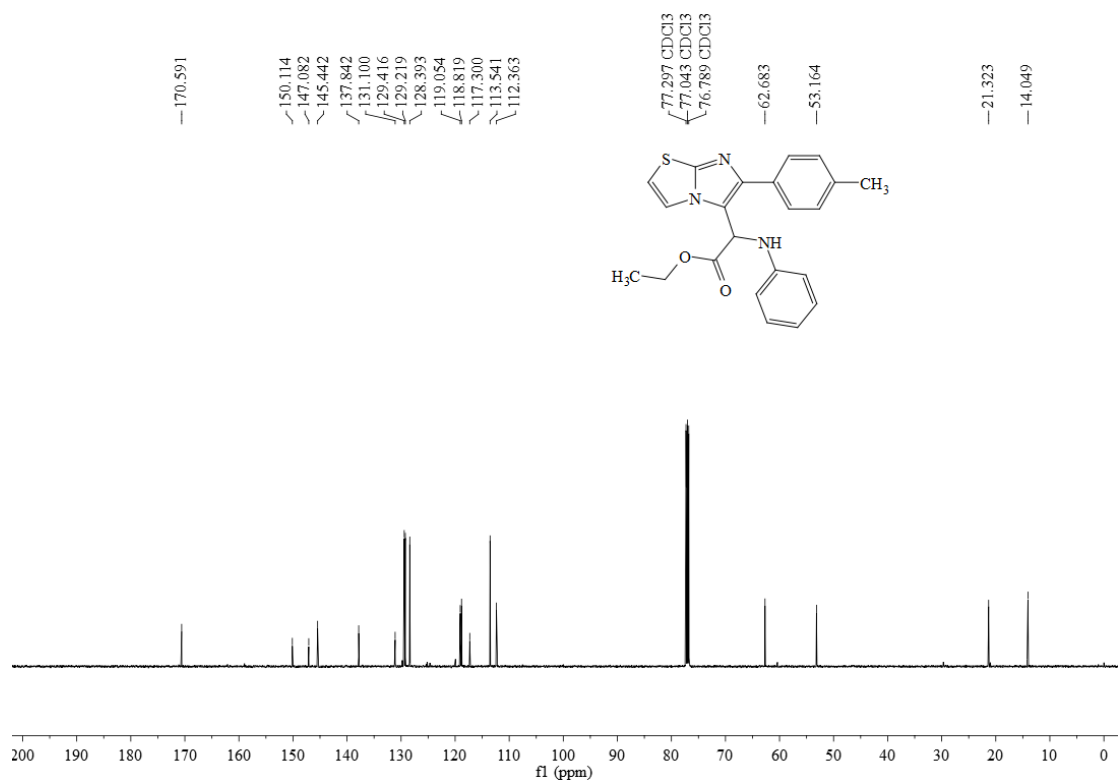

ethyl 2-(6-(4-methoxyphenyl)imidazo[2,1-b]thiazol-5-yl)-2-(phenylamino)acetate (23).

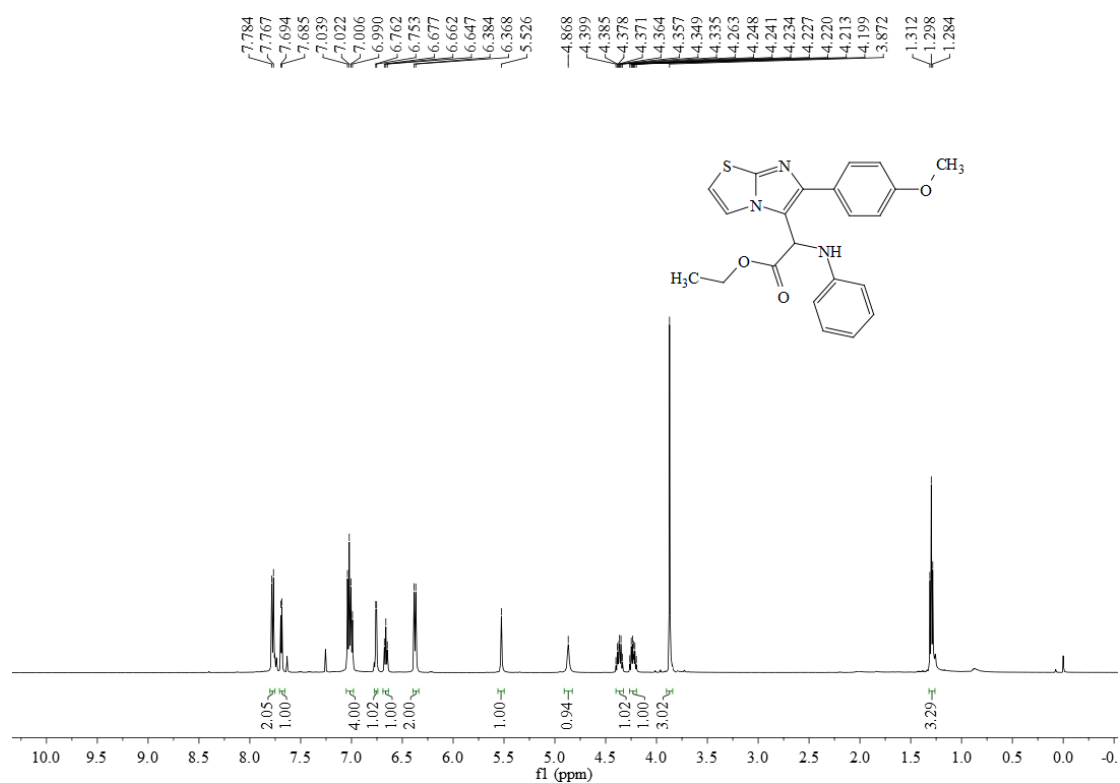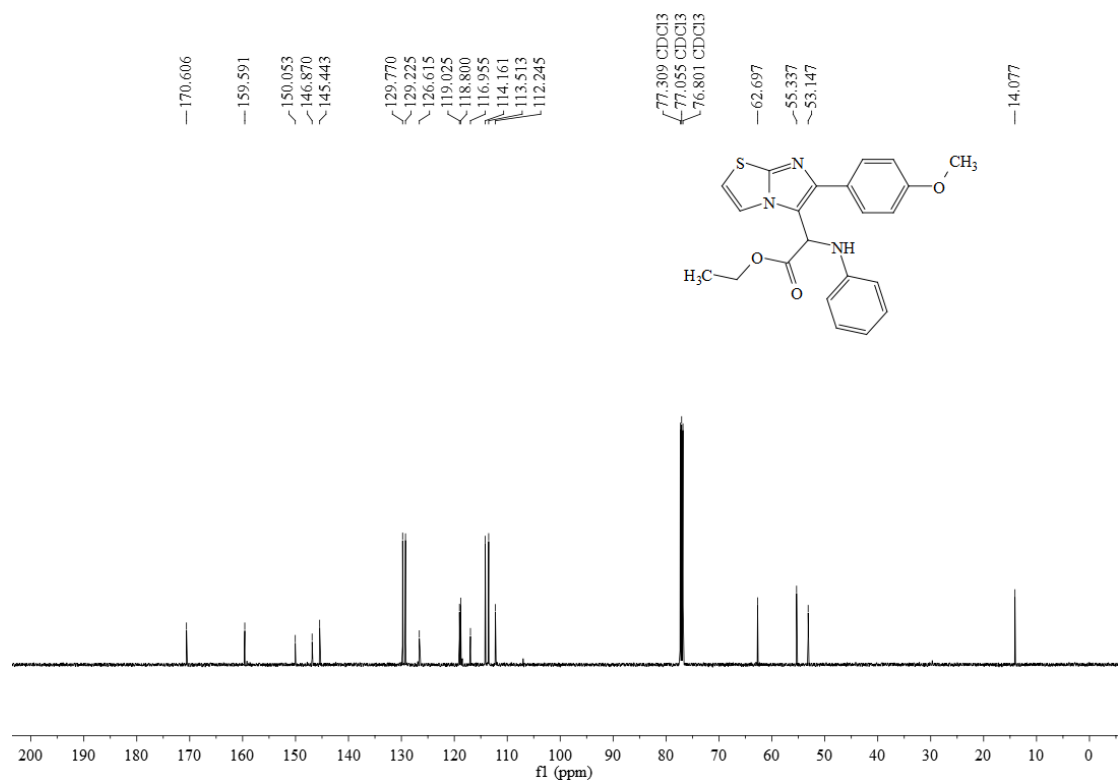

ethyl 2-(6-(4-fluorophenyl)imidazo[2,1-b]thiazol-5-yl)-2-(phenylamino)acetate (24).

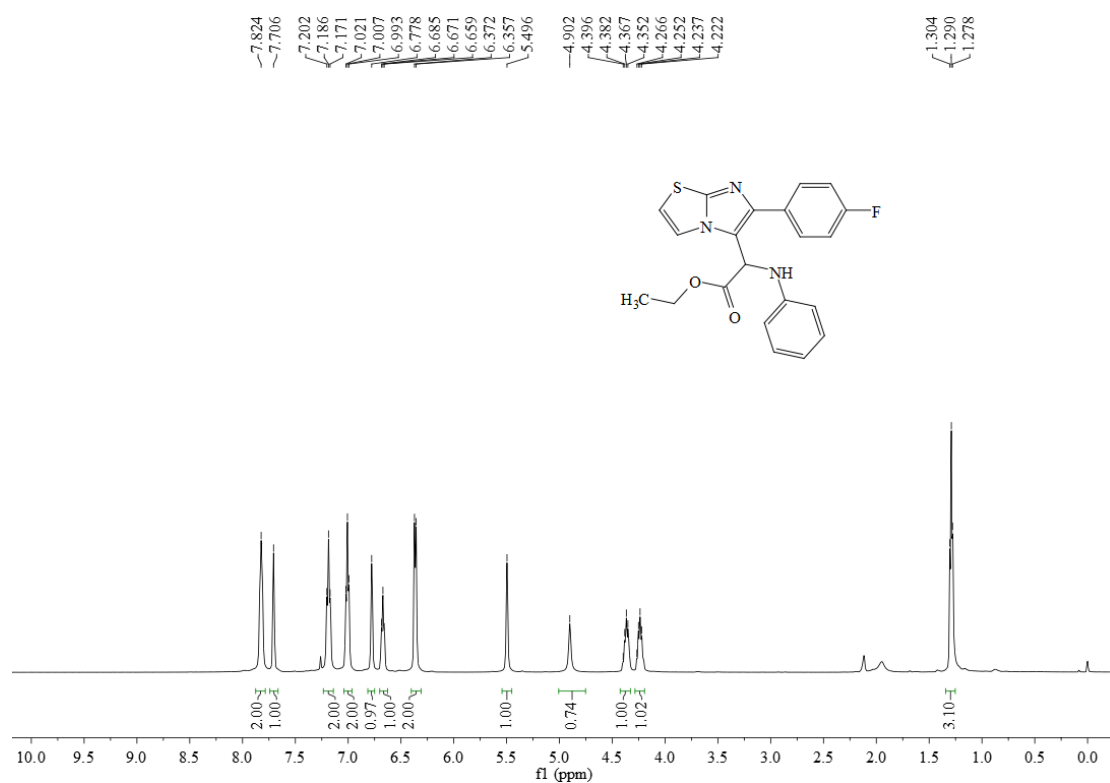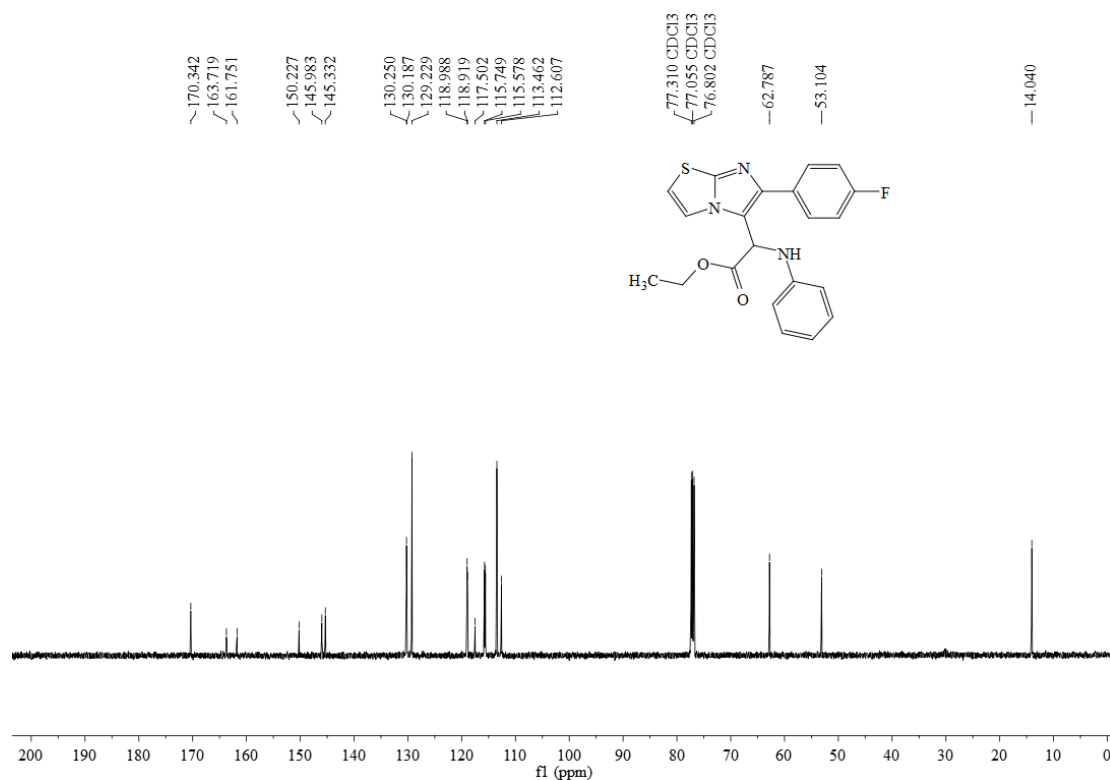

ethyl 2-(7-methyl-2-phenylbenzo[d]imidazo[2,1-b]thiazol-3-yl)-2-(phenylamino)acetate (25).

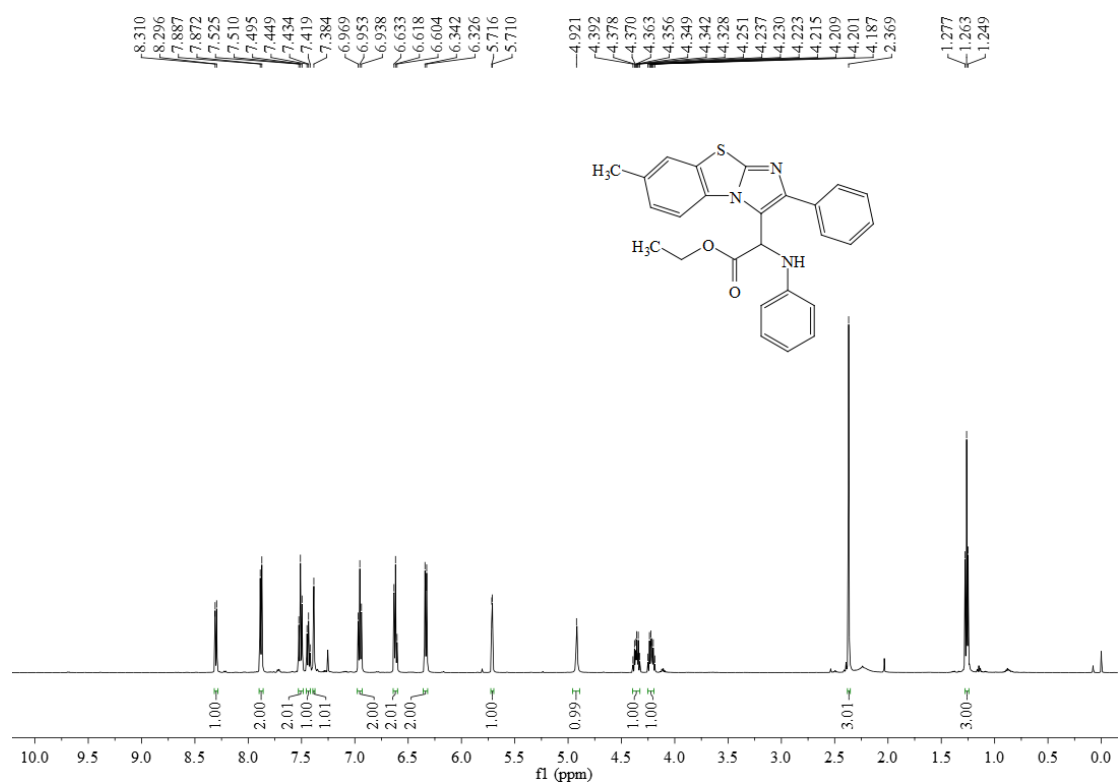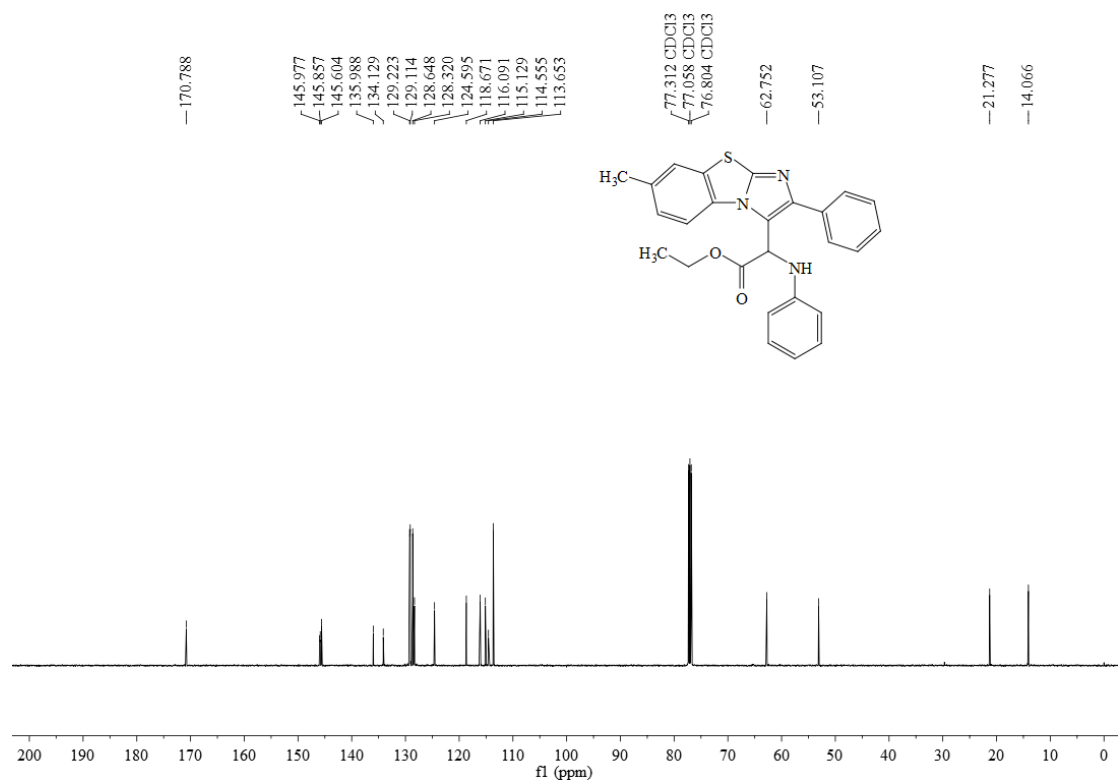



ethyl 2-(phenylamino)-2-(2-phenylimidazo[1,2-a]pyrimidin-3-yl)acetate (26).

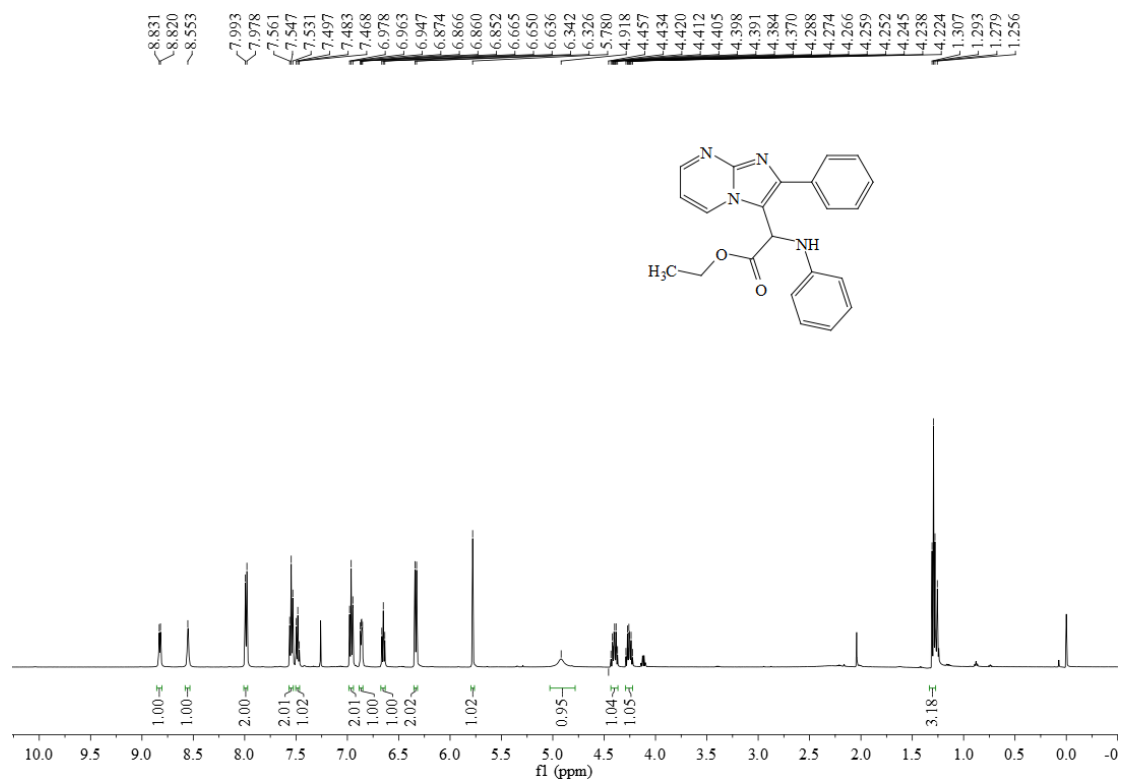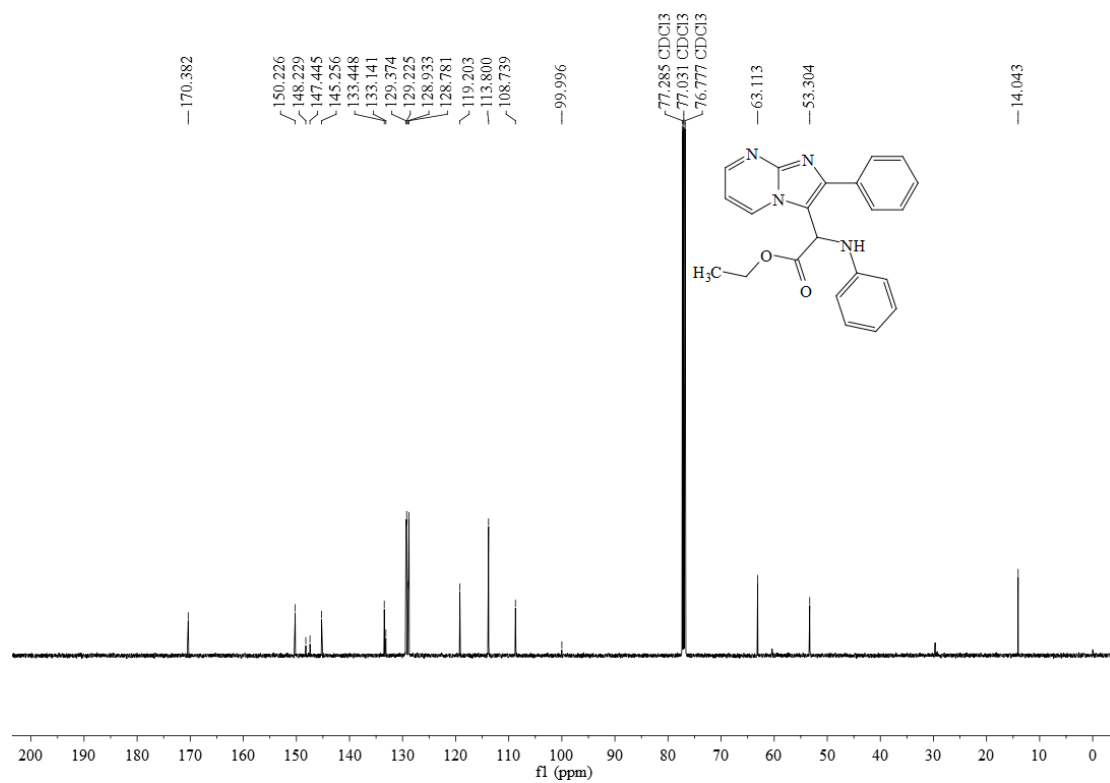

**(Z)-1-phenyl-2-(2-phenylimidazo[1,2-a]pyridin-3-yl)-2-(phenylimino)ethanone (27).**

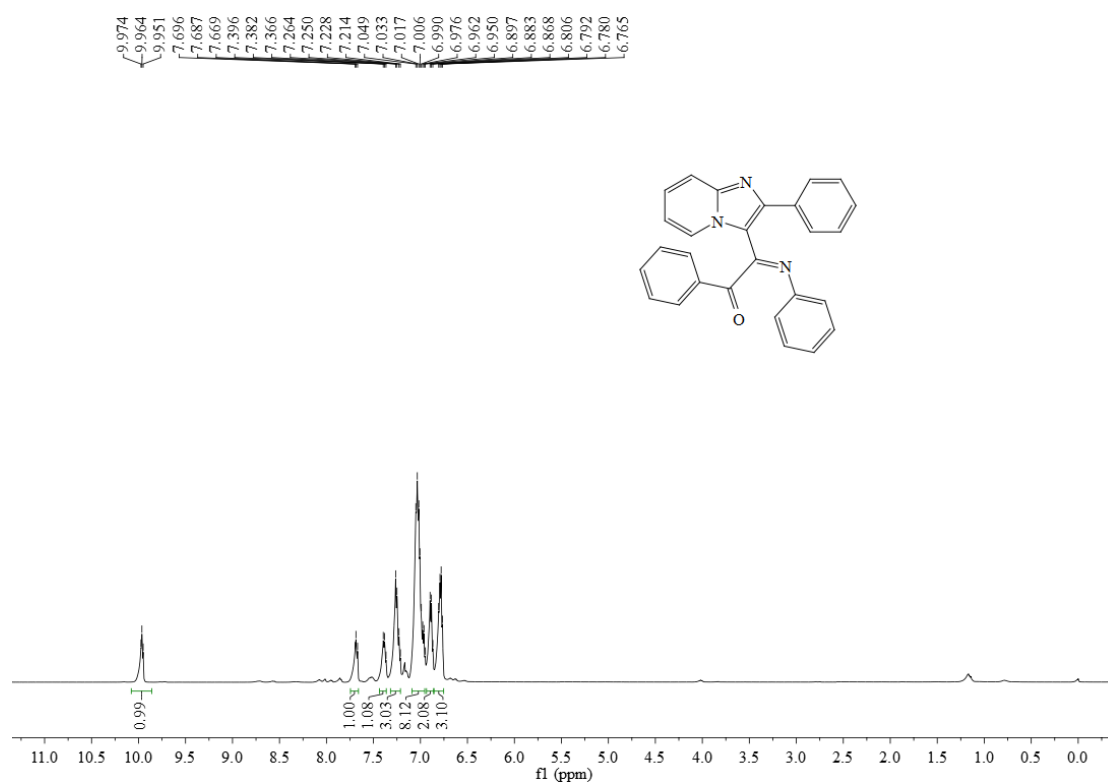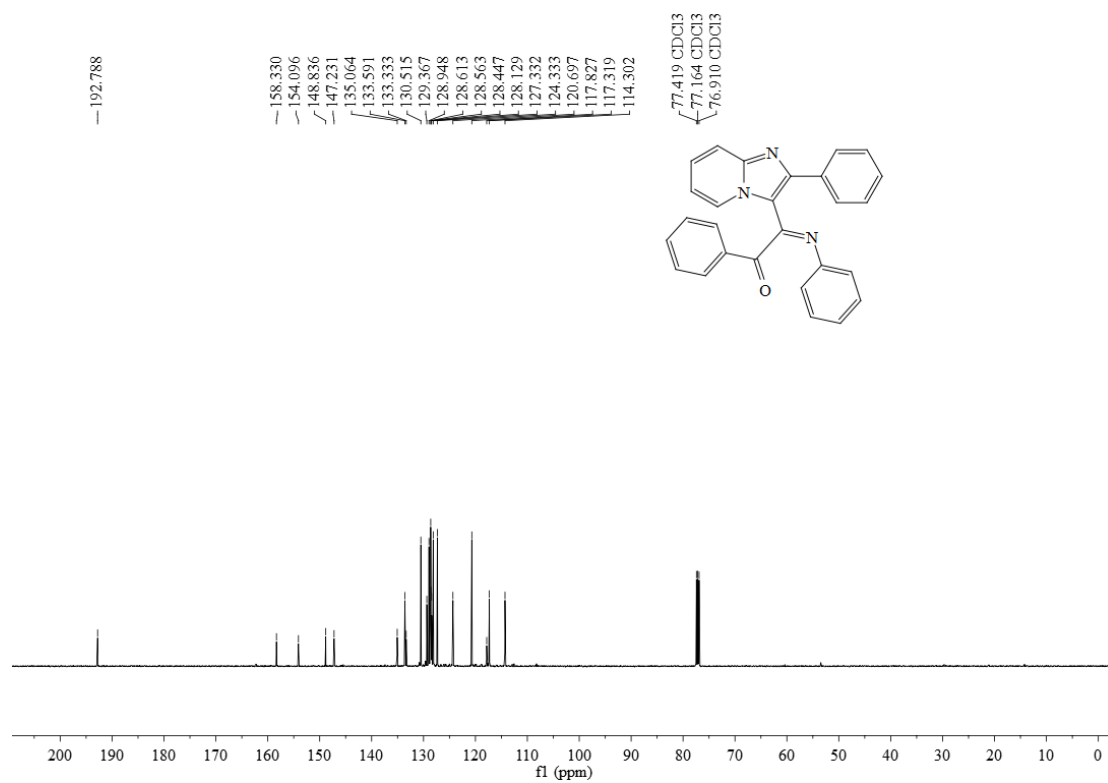

phenyl-2-(2-phenylimidazo[1,2-a]pyridin-3-yl)ethane-1,2-dione (28).

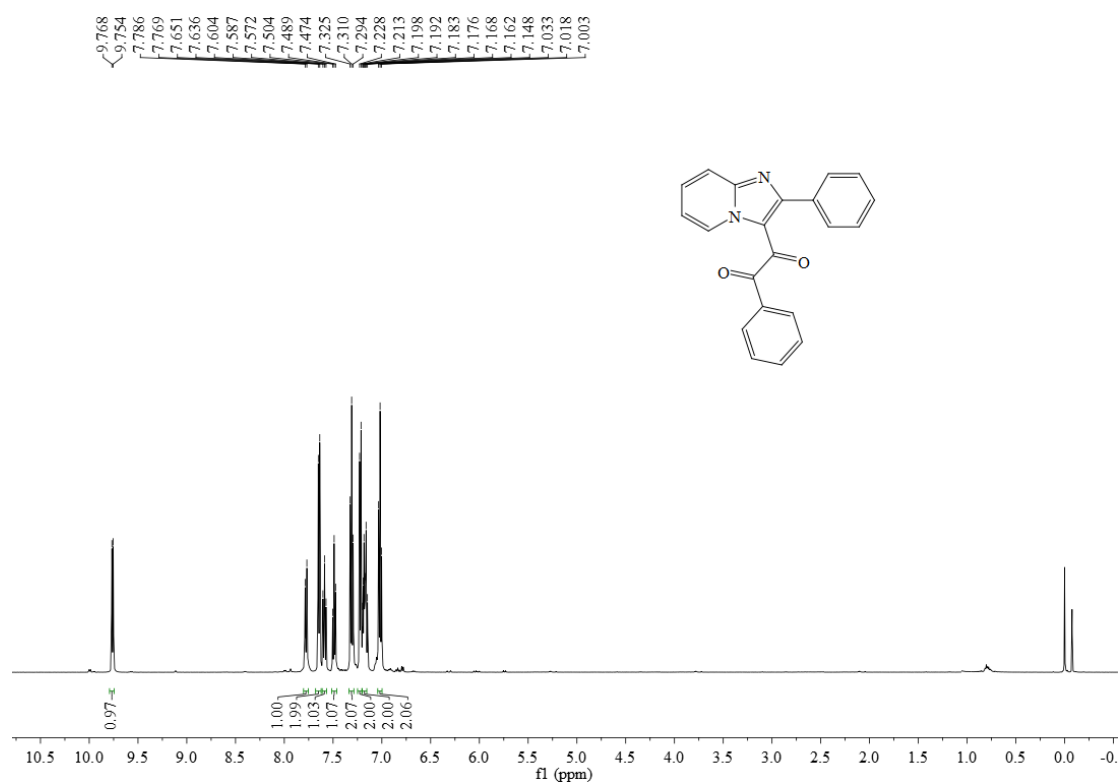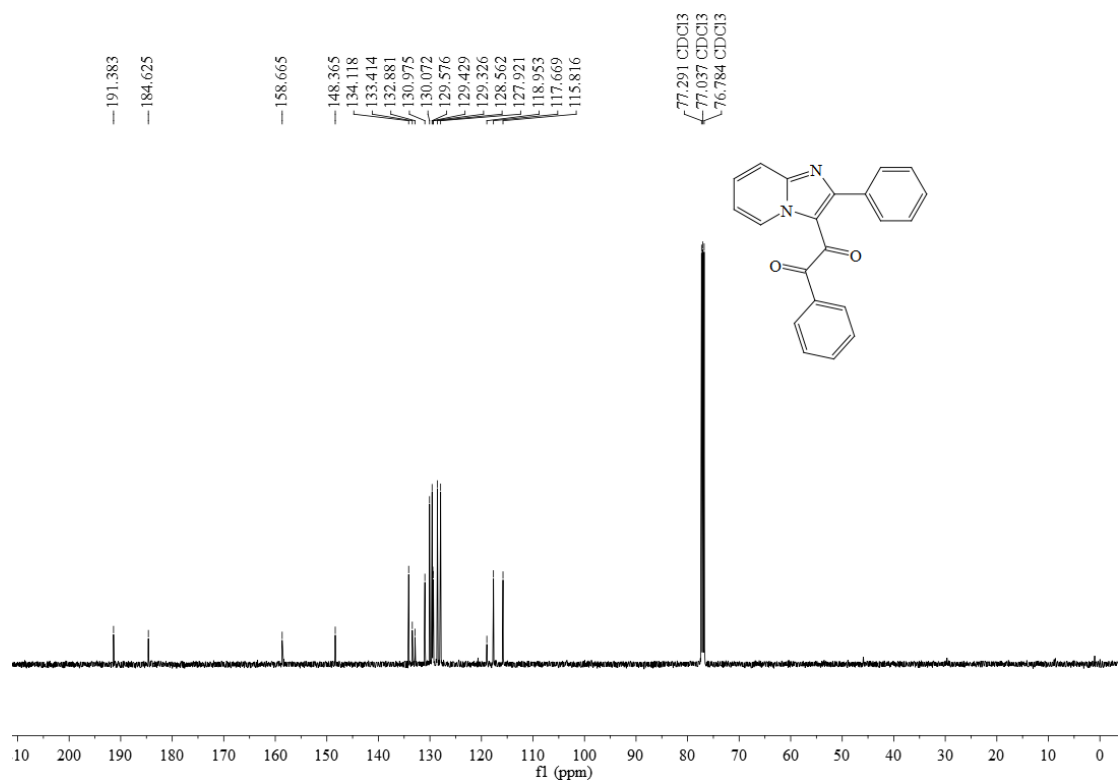

2-(phenylamino)-2-(2-phenylimidazo[1,2-a]pyridin-3-yl)acetic acid (29).

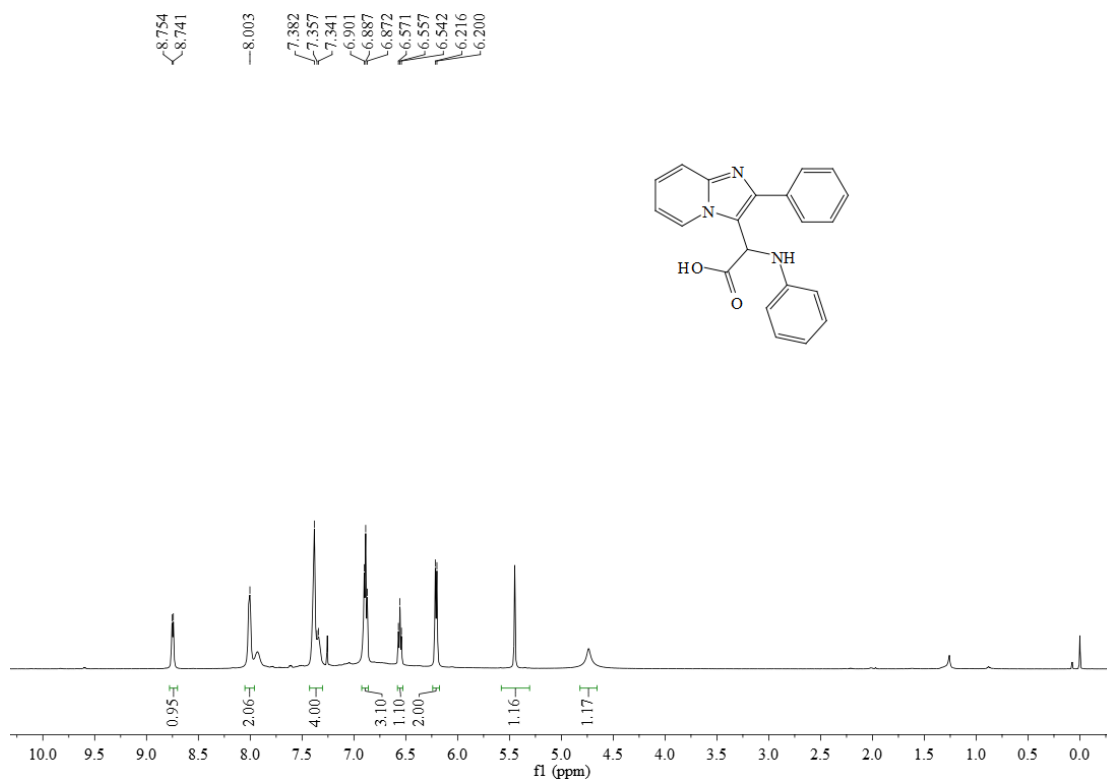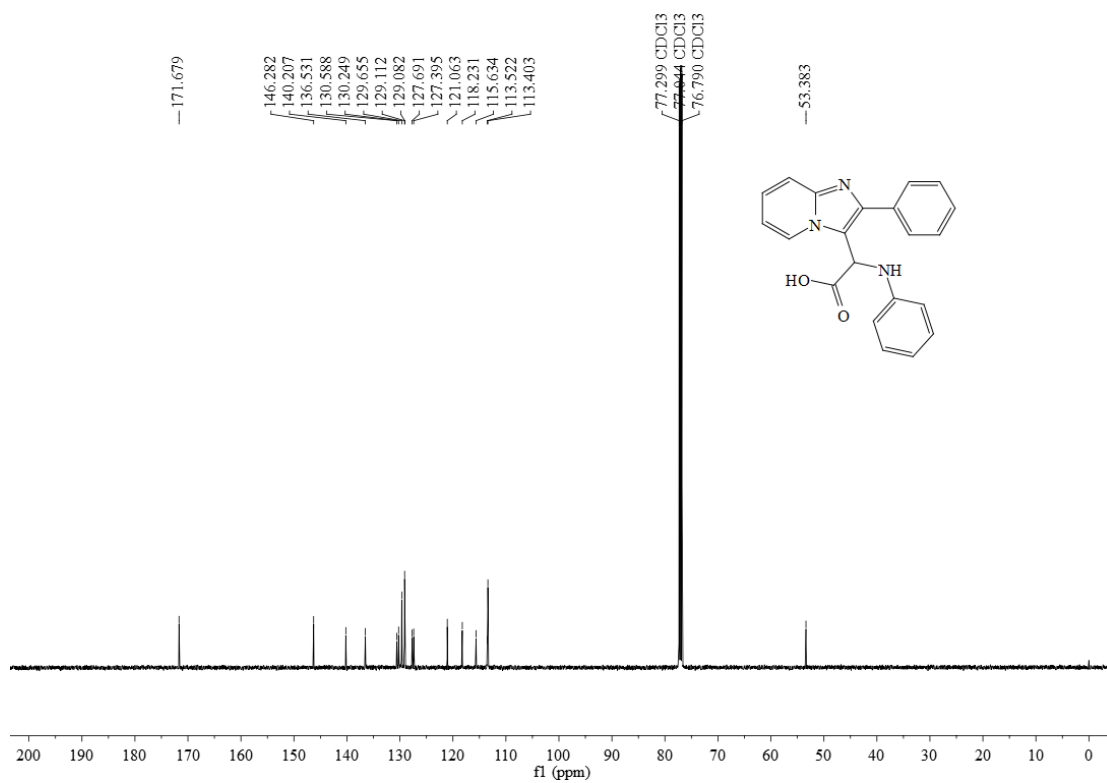

Supplement: c7ra05303g1.pdf [file c7ra05303g1.pdf]
